# Supplementary material for: Development and application of a United States-wide correction for PM 2.5 data collected with the PurpleAir sensor
Source: Copernicus journal article supplement (doi:10.5194/amt-14-4617-2021), 2021-06-22
Supplement: Supplementary file 1 [file amt-14-4617-2021-supplement.pdf]

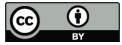

*Supplement of*

## **Development and application of a United States-wide correction for PM<sub>2.5</sub> data collected with the PurpleAir sensor**

**Karoline K. Barkjohn et al.**

*Correspondence to:* Karoline K. Barkjohn ([barkjohn.karoline@epa.gov](mailto:barkjohn.karoline@epa.gov))

The copyright of individual parts of the supplement might differ from the article licence.

## 1 Performance statistics equations

$$\text{RMSE} = \sqrt{\frac{1}{N} \sum_{d=1}^N (x_d - R_d)^2}$$

Eq. S1

$$\text{MBE} = \frac{1}{N} \sum_{d=1}^N (x_d) - \frac{1}{N} \sum_{d=1}^N (R_d)$$

Eq. S2

$$\text{MAE} = \frac{1}{N} \sum_{d=1}^N \text{abs}(x_d - R_d)$$

Eq. S3

where:

RMSE = root mean square error ( $\mu\text{g m}^{-3}$ )

MBE = mean bias error ( $\mu\text{g m}^{-3}$ )

MAE = mean absolute error ( $\mu\text{g m}^{-3}$ )

M = number of identical sensors operated simultaneously during a field test

N = number of 24-hour periods during which all identical instruments are operating and returning valid averages over the duration of the field test

$x_d$  = valid 24-hour averaged sensor  $\text{PM}_{2.5}$  concentration for day  $d$  ( $\mu\text{g}/\text{m}^3$ )

$R_d$  = valid 24-hour averaged FRM or FEM  $\text{PM}_{2.5}$  concentration for day  $d$  ( $\mu\text{g m}^{-3}$ )

## 2 Discussion of state by state performance

Uncorrected PurpleAir sensors in this work overestimate  $\text{PM}_{2.5}$  in every state on average except for Florida (Figure S4); this typical overprediction is indicated by MBE greater than  $0 \mu\text{g m}^{-3}$ . Figure S4 shows the state-by-state performance before and after correction. The MBE after correction is within  $3 \mu\text{g m}^{-3}$  in each state with 24-hr  $\text{RMSE} \leq 3.7 \mu\text{g m}^{-3}$ , showing large improvements from the initial dataset. The RMSE is reduced and the MBE moves closer to zero across all states except Alaska and Arizona where RMSE improves but MBE moves slightly further from 0 (AK  $\text{MBE}_{\text{raw}}=0.8 \mu\text{g m}^{-3}$ ,  $\text{MBE}_{\text{corrected}}=-1.0 \mu\text{g m}^{-3}$ ; AZ  $\text{MBE}_{\text{raw}}=0.4 \mu\text{g m}^{-3}$ ,  $\text{MBE}_{\text{corrected}}=-0.5 \mu\text{g m}^{-3}$ ) and Florida where correction slightly increases RMSE and increases underprediction ( $\text{MBE}_{\text{raw}}=-0.3 \mu\text{g m}^{-3}$ ,  $\text{MBE}_{\text{corrected}}=-3.7 \mu\text{g m}^{-3}$ ). It is important to note that the reported performance may not accurately summarize state-wide performance in states with less than a year of data (indicated in Figure S4 by states with white background labels) and in states with a single PurpleAir collocated at a single site. To illustrate, Florida is represented by a single PurpleAir sensor located at a single site for less than a year; the performance in Florida may be influenced by a different aerosol composition in Sarasota, Florida (e.g., higher sea salt contribution) or may be an issue unique to the FEM and PurpleAir running at the site.

### 3 Importance of QC procedures

We apply the final correction and consider the error with and without the QC procedures. There are limitations to this method since we are looking at the error after building a model based on the full dataset. However, these methods provide us with easily interpretable results. Future work could use sensitivity analysis to explore the importance of QC procedures and the most appropriate values (e.g. 90% completeness, 61% difference between channels) in greater detail.

We apply the selected correction to the data without excluding any times where the A and B channels disagree and do not take into account the number of points that are going into each daily average (i.e. completeness), we can begin to understand the importance of these criteria (Table S7). Using only the A or B channels, the RMSE is 87 and 161  $\mu\text{g m}^{-3}$  respectively between the channel  $\text{PM}_{2.5}$  data and the FRM or FEM data; there is no correlation between the A or B channel data and the FRM or FEM. Averaging the two channels slightly improves the comparison (RMSE=92  $\mu\text{g m}^{-3}$ ). Using the AB comparison and excluding points where they are different by 5  $\mu\text{g m}^{-3}$  and 60% shows a large improvement in performance (RMSE A=4  $\mu\text{g m}^{-3}$ , B=3  $\mu\text{g m}^{-3}$ ,  $\text{AB}_{\text{avg}}$ =4  $\mu\text{g m}^{-3}$ ) with a slight improvement in the worse performing channel when the two channels are averaged. We are unaware of a reason why the A and B sensors should respond differently so this is likely a random difference between the sensors in the A group and the B group. If we also add the 90% completeness criteria to the AB channel exclusion, we see a slight improvement in RMSE (RMSE=3  $\mu\text{g m}^{-3}$ ). In this work, we also excluded three PurpleAir sensors because there was overall poor agreement between the A and B channels even after excluding individual data points. When we exclude these three sensors, the overall performance changes very little (RMSE=3  $\mu\text{g m}^{-3}$ ).

Table S1. Details for each AQS site as reported in AQS.

| AQS ID      | Latitude | Longitude | Land use type | Location setting      | Measurement scale            | Network                                 |
|-------------|----------|-----------|---------------|-----------------------|------------------------------|-----------------------------------------|
| 02-090-0034 | 64.84569 | -147.727  | Commercial    | Urban and center city | Neighborhood                 | CSN supplemental, NCORE                 |
| 04-013-0019 | 33.48385 | -112.143  | Residential   | Suburban              | Neighborhood                 |                                         |
| 04-013-1004 | 33.56033 | -112.066  | Residential   | Suburban              | Neighborhood                 |                                         |
| 04-013-9812 | 33.4265  | -112.118  | Commercial    | Urban and center city | Neighborhood                 |                                         |
| 06-067-0010 | 38.56844 | -121.493  | Residential   | Urban and center city | Neighborhood                 | CSN supplemental                        |
| 06-111-0007 | 34.21017 | -118.871  | Residential   | Suburban              | Neighborhood                 |                                         |
| 06-083-0011 | 34.42778 | -119.691  | Residential   | Urban and center city | Neighborhood                 |                                         |
| 06-071-0306 | 34.51098 | -117.326  | Residential   | Suburban              | Neighborhood                 |                                         |
| 06-083-1008 | 34.94287 | -120.436  | Commercial    | Urban and center city | Neighborhood                 |                                         |
| 06-111-2002 | 34.27632 | -118.684  | Residential   | Suburban              | Neighborhood                 |                                         |
| 06-083-2004 | 34.63782 | -120.458  | Commercial    | Urban and center city | Neighborhood                 |                                         |
| 06-079-2007 | 35.04673 | -120.588  | Industrial    | Rural                 | Neighborhood                 |                                         |
| 06-083-2011 | 34.44551 | -119.828  | Residential   | Suburban              | Urban scale                  |                                         |
| 06-111-3001 | 34.25239 | -119.143  | Residential   | Rural                 | Neighborhood                 |                                         |
| 06-079-8002 | 35.49453 | -120.666  | Commercial    | Suburban              | Neighborhood,<br>urban scale |                                         |
| 06-037-9033 | 34.67139 | -118.131  | Commercial    | Urban and center city | Neighborhood                 |                                         |
| 08-031-0026 | 39.77949 | -105.005  | Residential   | Urban and center city | Neighborhood                 | CSN STN, NCORE, proposed NCORE          |
| 10-003-2004 | 39.73944 | -75.5581  | Commercial    | Urban and center city | Neighborhood                 | CSN supplemental, NCORE                 |
| 12-115-0013 | 27.29056 | -82.5072  | Residential   | Urban and center city | Neighborhood                 |                                         |
| 13-089-0002 | 33.6878  | -84.2905  | Residential   | Suburban              | Neighborhood                 | CSN STN, IMPROVE, NCORE, proposed NCORE |
| 19-163-0015 | 41.53001 | -90.5876  | Residential   | Urban and center city | Neighborhood                 | CSN supplemental, NCORE, proposed NCORE |
| 19-163-0020 | 41.51208 | -90.6240  | Residential   | Urban and center city | Neighborhood                 |                                         |
| 19-153-0030 | 41.60316 | -93.6431  | Commercial    | Urban and center city | Neighborhood                 |                                         |
| 19-113-0040 | 41.97677 | -91.6877  | Residential   | Urban and center city | Neighborhood                 |                                         |
| 19-103-2001 | 41.65723 | -91.5035  | Residential   | Urban and center city | Neighborhood                 |                                         |
| 20-177-0013 | 39.02427 | -95.7113  | Residential   | Urban and center city | Neighborhood                 |                                         |
| 30-063-0024 | 46.84218 | -114.021  | Residential   | Suburban              | Neighborhood                 |                                         |
| 37-067-0022 | 36.11069 | -80.2264  | Residential   | Urban and center city | Neighborhood                 | CSN supplemental                        |
| 40-109-1037 | 35.61413 | -97.4751  | Residential   | Suburban              | Urban scale                  | CSN supplemental                        |
| 40-115-9007 | 36.9857  | -94.8393  | Residential   | Rural                 | Neighborhood                 |                                         |

|                    |          |          |             |                       |                                              |                      |
|--------------------|----------|----------|-------------|-----------------------|----------------------------------------------|----------------------|
| <b>50-021-0002</b> | 43.60806 | -72.9828 | Commercial  | Urban and center city | Neighborhood                                 |                      |
| <b>51-087-0014</b> | 37.55652 | -77.4003 | Residential | Suburban              | Neighborhood                                 | CSNSTN, NATTS, NCORE |
| <b>53-033-0057</b> | 47.55975 | -122.338 | Industrial  | Suburban              | Neighborhood                                 | CSN supplemental     |
| <b>53-061-1007</b> | 48.05432 | -122.172 | Residential | Suburban              | Neighborhood                                 | CSN supplemental     |
| <b>53-061-0005</b> | 47.8064  | -122.317 | Commercial  | Suburban              | Neighborhood                                 |                      |
| <b>55-087-0009</b> | 44.30738 | -88.3952 | Residential | Suburban              | Urban scale<br>Neighborhood,                 |                      |
| <b>55-079-0026</b> | 35.61413 | -97.4751 | Commercial  | Urban and center city | urban scale<br>Middle scale,<br>neighborhood |                      |
| <b>55-133-0027</b> | 43.02008 | -88.2151 | Residential | Urban and center city | neighborhood                                 |                      |
| <b>55-025-0041</b> | 43.10084 | -89.3573 | Commercial  | Urban and center city | Urban scale                                  |                      |

---

Table S2. Details for each individual sensor summarized as median (min, max).

| PA ID | PA name (not included for private sensors)   | AQS site    | Start Date | End Date   | # of Days | FEM or FRM | FEM or FRM PM <sub>2.5</sub> (µg m <sup>-3</sup> ) | PA PM <sub>2.5</sub> (µg m <sup>-3</sup> ) | PA T (°C)  | PA RH (%)   |
|-------|----------------------------------------------|-------------|------------|------------|-----------|------------|----------------------------------------------------|--------------------------------------------|------------|-------------|
| DE1   | Private                                      | 10-030-2004 | 7/27/2019  | 11/18/2019 | 205       | both       | 7 (1,17)                                           | 9 (1,35)                                   | 25 (6,35)  | 51 (34,75)  |
| AK2   | Ncore 2                                      | 02-090-0034 | 11/7/2018  | 1/12/2019  | 54        | FRM        | 12 (2,32)                                          | 10 (1,28)                                  | -4 (-25,2) | 53 (37,59)  |
| AK4   | Ncore 3                                      | 02-090-0034 | 1/15/2019  | 6/16/2019  | 189       | FRM        | 4 (0,35)                                           | 4 (0,37)                                   | 6 (-20,24) | 46 (22,71)  |
| AK1   | ADEC 1                                       | 02-090-0034 | 5/15/2019  | 9/30/2019  | 126       | FRM        | 4 (0,60)                                           | 4 (0,131)                                  | 18 (7,29)  | 46 (21,76)  |
| AZ4   | Private                                      | 04-013-0019 | 11/9/2018  | 12/31/2019 | 435       | both       | 7 (2,43)                                           | 5 (1,74)                                   | 26 (9,44)  | 25 (5,67)   |
| AZ1   | Private                                      | 04-013-1004 | 11/30/2018 | 2/18/2019  | 76        | FEM        | 9 (2,26)                                           | 14 (1,43)                                  | 17 (10,22) | 36 (22,65)  |
| AZ3   | Private                                      | 04-013-9812 | 11/9/2018  | 12/31/2019 | 384       | FEM        | 8 (1,28)                                           | 5 (0,50)                                   | 25 (9,44)  | 26 (6,73)   |
| CA10  | MDAQMD_LAN1                                  | 06-037-9033 | 4/25/2018  | 7/25/2019  | 393       | FEM        | 7 (-1,40)                                          | 6 (0,73)                                   | 25 (6,39)  | 21 (4,63)   |
| CA1   | AMTS_TESTINGA                                | 06-067-0010 | 5/20/2018  | 12/29/2019 | 161       | FRM        | 6 (1,109)                                          | 6 (0,250)                                  | 22 (9,36)  | 45 (23,77)  |
| CA13  | MDAQMD_VV1                                   | 06-071-0306 | 3/22/2018  | 7/24/2019  | 619       | FEM        | 8 (1,33)                                           | 7 (0,73)                                   | 28 (6,42)  | 17 (4,56)   |
| CA15  | SCNP_21                                      | 06-079-2007 | 6/2/2018   | 1/4/2019   | 183       | FEM        | 7 (-2,47)                                          | 9 (1,66)                                   | 18 (12,25) | 66 (35,100) |
| CA2   | Atascadero                                   | 06-079-8002 | 11/29/2017 | 10/23/2019 | 659       | FEM        | 5 (-2,34)                                          | 5 (0,69)                                   | 19 (6,34)  | 48 (16,79)  |
| CA16  | SCPR_19                                      | 06-079-8002 | 5/2/2018   | 8/14/2018  | 105       | FEM        | 6 (-1,19)                                          | 7 (2,17)                                   | 19 (16,26) | 60 (42,65)  |
| CA5   | CARB_Smoke_SB<br>CAPCD_Santa<br>Barbara      | 06-083-0011 | 1/31/2019  | 10/30/2019 | 246       | FEM        | 7 (1,23)                                           | 9 (1,25)                                   | 22 (11,29) | 56 (26,74)  |
| CA6   | CARB_Smoke_SB<br>CAPCD_Santa<br>Maria        | 06-083-1008 | 1/31/2019  | 4/29/2019  | 86        | FEM        | 4 (1,15)                                           | 4 (0,21)                                   | 18 (7,23)  | 54 (34,68)  |
| CA4   | CARB_Smoke_SB<br>CAPCD_Lompoc                | 06-083-2004 | 11/15/2018 | 10/29/2019 | 282       | FEM        | 4 (-2,30)                                          | 7 (1,69)                                   | 20 (12,29) | 55 (22,78)  |
| CA3   | CARB_Smoke_SB<br>CAPCD_Goleta                | 06-083-2011 | 1/24/2019  | 10/29/2019 | 265       | FEM        | 5 (0,14)                                           | 8 (1,27)                                   | 22 (6,29)  | 55 (24,77)  |
| CA19  | VCAPCD_TO                                    | 06-111-0007 | 4/30/2019  | 10/29/2019 | 152       | FEM        | 9 (2,15)                                           | 12 (1,28)                                  | 25 (17,32) | 45 (3,60)   |
| CA18  | VCAPCD_SV                                    | 06-111-2002 | 11/9/2018  | 10/29/2019 | 398       | FEM        | 9 (0,23)                                           | 10 (0,39)                                  | 25 (12,35) | 37 (2,69)   |
| CA17  | VCAPCD_ER                                    | 06-111-3001 | 10/26/2018 | 10/29/2019 | 213       | FEM        | 6 (0,24)                                           | 7 (0,47)                                   | 19 (11,30) | 54 (8,72)   |
| CO1   | Private                                      | 08-031-0026 | 8/22/2019  | 11/18/2019 | 113       | both       | 7 (2,25)                                           | 6 (1,45)                                   | 18 (-5,32) | 33 (18,70)  |
| FL1   | SCG Air & Water<br>Quality_EPA Air<br>Sensor | 12-115-0013 | 5/31/2019  | 9/30/2019  | 119       | FEM        | 6 (3,17)                                           | 5 (1,25)                                   | 32 (29,35) | 60 (49,73)  |
| GA1   | Private                                      | 13-089-0002 | 8/2/2019   | 11/18/2019 | 184       | both       | 9 (3,18)                                           | 15 (5,34)                                  | 29 (5,36)  | 55 (44,77)  |

|      |                                      |             |            |            |      |      |           |           |               |             |
|------|--------------------------------------|-------------|------------|------------|------|------|-----------|-----------|---------------|-------------|
| IA8  | Private                              | 19-103-2001 | 1/1/2019   | 1/13/2020  | 1031 | both | 7 (1,31)  | 11 (1,54) | 11 (-21,34)   | 56 (28,80)  |
| IA9  | Private                              | 19-103-2001 | 1/1/2019   | 1/13/2020  | 1028 | both | 7 (1,31)  | 11 (1,58) | 11 (-20,35)   | 57 (29,100) |
| IA1  | Private                              | 19-113-0040 | 4/27/2018  | 1/13/2020  | 1865 | both | 7 (-1,28) | 12 (0,56) | 18 (-21,36)   | 47 (20,68)  |
| IA2  | Private                              | 19-113-0040 | 5/5/2018   | 1/13/2020  | 1827 | both | 7 (-1,28) | 11 (0,50) | 17 (-23,35)   | 51 (26,71)  |
| IA3  | Private                              | 19-153-0030 | 9/26/2017  | 1/13/2020  | 2473 | both | 6 (-1,27) | 10 (0,63) | 11 (-23,36)   | 55 (25,100) |
| IA4  | Private                              | 19-153-0030 | 2/2/2019   | 1/13/2020  | 999  | both | 6 (0,27)  | 10 (1,53) | 16 (-13,36)   | 56 (30,82)  |
| IA10 | Private                              | 19-163-0015 | 1/1/2019   | 6/14/2019  | 481  | both | 8 (1,29)  | 16 (2,64) | 10 (-26,29)   | 57 (33,79)  |
| IA11 | Private                              | 19-163-0015 | 1/1/2019   | 1/13/2020  | 1005 | both | 8 (1,36)  | 13 (1,69) | 14 (-27,34)   | 53 (24,77)  |
| IA12 | Private                              | 19-163-0020 | 5/29/2019  | 12/31/2019 | 198  | FRM  | 7 (2,31)  | 11 (1,64) | 22 (-7,34)    | 59 (42,85)  |
| KS1  | PAKNI_65                             | 20-177-0013 | 3/13/2019  | 9/30/2019  | 124  | FEM  | 9 (2,33)  | 11 (0,49) | 25 (10,34)    | 53 (30,71)  |
| KS2  | PAKNI_B5                             | 20-177-0013 | 3/13/2019  | 9/30/2019  | 111  | FEM  | 8 (3,33)  | 11 (1,49) | 25 (11,33)    | 53 (30,70)  |
| KS3  | PAKNI_E2                             | 20-177-0013 | 3/13/2019  | 9/28/2019  | 71   | FEM  | 9 (3,33)  | 10 (1,50) | 22 (9,33)     | 51 (31,70)  |
| MT1  | EPA 92B4                             | 30-063-0024 | 12/3/2019  | 12/10/2019 | 8    | FEM  | 10 (5,15) | 22 (6,36) | 4 (2,6)       | 54 (42,62)  |
| NC4  | Clean Air Carolina<br>Forsyth County | 37-067-0022 | 3/25/2018  | 10/24/2019 | 700  | both | 7 (0,20)  | 13 (1,43) | 25 (-1,35)    | 48 (16,79)  |
| OK1  | Private                              | 40-109-1037 | 8/3/2019   | 11/18/2019 | 120  | both | 10 (4,23) | 10 (1,32) | 30 (1,38)     | 51 (29,78)  |
| OK3  | Quapaw<br>Picher_Netta               | 40-115-9007 | 7/10/2019  | 9/30/2019  | 70   | FEM  | 8 (1,25)  | 14 (1,35) | 30 (24,33)    | 64 (53,86)  |
| VT1  | Rutland Courthouse                   | 50-021-0002 | 3/30/2019  | 9/30/2019  | 146  | both | 6 (2,18)  | 8 (1,31)  | 24 (12,34)    | 52 (36,71)  |
| VA1  | East Henrico                         | 51-087-0014 | 10/27/2019 | 12/29/2019 | 30   | FRM  | 5 (2,20)  | 10 (2,41) | 12 (8,25)     | 48 (35,65)  |
| WA1  | Duwamish                             | 53-033-0057 | 10/16/2017 | 10/28/2019 | 561  | FEM  | 7 (1,35)  | 8 (1,80)  | 14 (-1,30)    | 59 (26,81)  |
| WA2  | Lynnwood                             | 53-061-0005 | 12/4/2017  | 8/6/2018   | 235  | FEM  | 3 (1,26)  | 6 (0,89)  | 12 (1,27)     | 64 (35,84)  |
| WA3  | Marysville 7th                       | 53-061-1007 | 10/25/2018 | 9/25/2019  | 239  | FEM  | 7 (0,41)  | 9 (1,81)  | 12 (-2,23)    | 67 (36,81)  |
| WI4  | Private                              | 55-025-0041 | 1/19/2019  | 10/24/2019 | 185  | both | 6 (2,32)  | 9 (1,58)  | -142 (-142,9) | 47 (35,63)  |
| WI5  | Private                              | 55-025-0041 | 5/5/2019   | 5/7/2019   | 3    | FEM  | 5 (3,7)   | 7 (3,9)   | 16 (14,18)    | 55 (41,56)  |
| WI1  | Private                              | 55-079-0026 | 7/24/2019  | 11/18/2019 | 115  | FEM  | 7 (2,21)  | 10 (1,50) | 22 (-6,33)    | 57 (37,82)  |
| WI2  | Private                              | 55-087-0009 | 1/6/2019   | 10/24/2019 | 450  | FEM  | 6 (1,30)  | 9 (1,64)  | 19 (-18,32)   | 55 (31,78)  |
| WI3  | Private                              | 55-087-0009 | 3/30/2019  | 4/4/2019   | 12   | FEM  | 5 (3,11)  | 5 (2,23)  | 5 (1,7)       | 42 (35,63)  |
| WI6  | Private                              | 55-133-0027 | 1/1/2019   | 3/27/2019  | 46   | both | 10 (4,25) | 15 (3,55) | 0 (-21,11)    | 54 (34,72)  |

Table S3. FRM comparability by collecting agency

| State | AQS                                         | Organization                                                   | FRM/FRM<br>precision:<br>organization<br>comparison<br>(goal ≤10%) | FRM/FRM<br>bias:<br>organization<br>comparison<br>(goal ≤10%) | Field<br>blank<br>avg<br>(µg) | monthly<br>precision<br>(+/-) |
|-------|---------------------------------------------|----------------------------------------------------------------|--------------------------------------------------------------------|---------------------------------------------------------------|-------------------------------|-------------------------------|
| AK    | 02-090-0034                                 | Alaska DEC                                                     | 8%                                                                 | NA                                                            | 7.6                           | <30%                          |
| CA    | 06-067-0010                                 | California Air Resources Board                                 | 8%                                                                 | -6.30%                                                        | 2                             | <15%                          |
| CO    | 08-031-0026                                 | Colorado DPHE                                                  | 7%                                                                 | -10.5%                                                        | 5                             | <15%                          |
| DE    | 10-003-2004                                 | Delaware DNR                                                   | 7%                                                                 | -10.1%                                                        | 2                             | <10%                          |
| GA    | 13-089-0002                                 | Georgia Air Protection Branch                                  | 8%                                                                 | -11.6%                                                        | 3                             | <26%                          |
| IA    | 19-113-0040                                 | Linn County Health Department                                  | 4.80%                                                              | -1%                                                           | 5                             | <10%                          |
| IA    | 19-153-0030                                 | Polk County Physical Planning                                  | 4%                                                                 | -0.60%                                                        | 4                             | <10%                          |
| NC    | 37-067-0022                                 | Forsyth County EAD                                             | 5.10%                                                              | -11%                                                          | 5                             | <10%                          |
| OK    | 40-109-1037                                 | Oklahoma Dept. Of EQAQD                                        | 6%                                                                 | -22.0%*                                                       | 1                             | <18%                          |
| WI    | 55-025-0041,<br>55-133-0027                 | Wisconsin Dept Of Natural Resources,<br>Air Monitoring Section | 4.80%                                                              | 1.10%                                                         | 4                             | <10%                          |
| AZ    | 04-013-2019                                 | Maricopa County Air Quality                                    | NA                                                                 | NA                                                            | NA                            | NA                            |
| IA    | 19-163-0015,<br>19-163-0020,<br>19-103-2001 | Iowa DNR                                                       | NA                                                                 | NA                                                            | NA                            | NA                            |
| VT    | 50-021-0002                                 | Vermont AEC                                                    | NA                                                                 | NA                                                            | 0                             | NA                            |

\*Driven by a single point



Table S4. Available FEM comparability assessments

| State | County     | AQS         | poc | monitor  | slope | int   | R    | Ratio | FRM<br>PM <sub>2.5</sub> | Most<br>Recent<br>year |
|-------|------------|-------------|-----|----------|-------|-------|------|-------|--------------------------|------------------------|
| OK    | Oklahoma   | 40-109-1037 | 3   | T640     | 0.98  | 2.35  | 0.89 | 1.30  | 7.3                      | 2019                   |
| IA    | Johnson    | 19-103-2001 | 3   | T640     | 1.01  | 1.76  | 0.96 | 1.24  | 7.8                      | 2020                   |
| IA    | Scott      | 19-163-0015 | 3   | T640     | 1.02  | 1.5   | 0.95 | 1.21  | 8.0                      | 2020                   |
| IA    | Johnson    | 19-103-2001 | 4   | T640     | 1.00  | 1.69  | 0.97 | 1.21  | 7.9                      | 2020                   |
| CO    | Denver     | 08-031-0026 | 3   | T640     | 1.01  | 1.11  | 0.97 | 1.17  | 6.8                      | 2019                   |
| GA    | DeKalb     | 13-089-0002 | 3   | T640x    | 0.99  | 1.31  | 0.95 | 1.15  | 8.4                      | 2019                   |
| IA    | Linn       | 19-113-0040 | 3   | T640     | 0.91  | 1.91  | 0.98 | 1.15  | 8.0                      | 2020                   |
| IA    | Scott      | 19-163-0015 | 4   | T640     | 0.96  | 1.44  | 0.95 | 1.14  | 8.0                      | 2020                   |
| VT    | Rutland    | 50-021-0002 | 4   | T640     | 0.99  | 0.93  | 0.99 | 1.13  | 6.6                      | 2019                   |
| NC    | Forsyth    | 37-67-0022  | 3   | T640x    | 0.90  | 1.66  | 0.89 | 1.13  | 7.4                      | 2019                   |
| CA    | Ventura    | 06-111-0007 | 3   | BAM1020  | 1.18  | -1.12 | 0.93 | 1.09  | 8.8                      | 2014                   |
| DE    | New Castle | 10-3-2004   | 6   | T640     | 0.94  | 1.17  | 0.97 | 1.09  | 7.7                      | 2019                   |
| CA    | Ventura    | 06-111-2002 | 3   | BAM1020  | 1.09  | -0.28 | 0.9  | 1.05  | 8.4                      | 2014                   |
| WI    | Milwaukee  | 55-079-0026 | 3   | T640x    | 0.91  | 1.19  | 0.97 | 1.05  | 8.6                      | 2018                   |
| FL    | Sarasota   | 12-115-0013 | 3   | T640     | 0.82  | 1.48  | 0.96 | 1.05  | 6.5                      | 2018                   |
| IA    | Polk       | 19-153-0030 | 3   | BAM1022  | 1.00  | 0.24  | 0.96 | 1.04  | 7.1                      | 2019                   |
| WI    | Waukesha   | 55-133-0027 | 3   | T640x    | 0.88  | 1.28  | 0.96 | 1.03  | 8.7                      | 2019                   |
| WI    | Dane       | 55-25-0041  | 3   | T640     | 0.90  | 0.85  | 0.95 | 1.01  | 7.8                      | 2019                   |
| AZ    | Maricopa   | 04-13-0019  | 3   | TEOM1405 | 1.03  | -0.29 | 0.98 | 1.00  | 8.9                      | 2019                   |
| CA    | Ventura    | 06-111-3001 | 3   | BAM1020  | 1.07  | -0.63 | 0.86 | 1.00  | 8.8                      | 2014                   |
| IA    | Linn       | 19-113-0040 | 3   | BAM1020  | 0.89  | 0.61  | 0.93 | 0.97  | 8.1                      | 2019                   |
| IA    | Linn       | 19-113-0040 | 4   | BAM1020  | 0.86  | 0.77  | 0.93 | 0.96  | 8.3                      | 2020                   |
| WA    | Snohomish  | 53-061-1007 | 3   | 1405     | 0.96  | -0.06 | 0.99 | 0.95  | 7.2                      | 2012                   |
| IA    | Polk       | 19-153-0030 | 4   | BAM1022  | 0.92  | 0.02  | 0.94 | 0.92  | 7.2                      | 2019                   |
| WI    | Outagamie  | 55-087-0009 | 3   | BAM1020  | 0.95  | -0.26 | 0.95 | 0.91  | 6.5                      | 2017                   |

Table S5. FEM comparability assessments-not available

| State | County          | AQS           | poc | monitor  | Notes:                   |
|-------|-----------------|---------------|-----|----------|--------------------------|
| AZ    | Maricopa        | x4-13-9812x   | 3   | TEOM1405 | Not on list              |
| AZ    | Maricopa        | x4-13-1004x   | 3   | TEOM1405 | Not on list              |
| CA    | Los Angeles     | x6-37-9033x   | 1   | BAM1020  | Not on list              |
| CA    | San Bernardino  | x6-71-306x    | 2   | BAM1020  | Not on list              |
| CA    | San Bernardino  | x6-71-306x    | 1   | BAM1020  | Not on list              |
| CA    | San Luis Obispo | x6-79-8002x   | 3   | BAM1020  | Not on list              |
| CA    | San Luis Obispo | x6-79-2007x   | 1   | BAM1020  | Not on list              |
| CA    | Santa Barbara   | x6-83-2004x   | 1   | BAM1020  | Not on list              |
| CA    | Santa Barbara   | x6-83-2011x   | 1   | BAM1020  | Not on list              |
| CA    | Santa Barbara   | x6-83-11x     | 3   | BAM1020  | Not on list              |
| CA    | Santa Barbara   | x6-83-1008x   | 3   | BAM1020  | Not on list              |
| CA    | Ventura         | x6-111-2002x  | 4   | BAM1020  | Not on list              |
| KS    | Shawnee         | x20-177-13x   | 2   | T640     | Report will not generate |
| MT    | Missoula        | x30-63-24x    | 3   | BAM1020  | Not on list              |
| OK    | Ottawa          | x40-115-9007x | 1   | T640     | Not on list              |
| WA    | King            | x53-33-57x    | 3   | 1405     | Not on list              |
| WA    | King            | x53-33-57x    | 5   | BAM1020  | Not on list              |
| WA    | Snohomish       | x53-61-5x     | 3   | TEOM1400 | Not on list              |
| WA    | Snohomish       | x53-61-1007x  | 5   | BAM1020  | Not on list              |
| WI    | Outagamie       | x55-87-9x     | 3   | T640     | Not on list              |
| WI    | Outagamie       | x55-87-9x     | 4   | T640     | Not on list              |

Table S6. Summary of comparison between A and B channels and AB channel averages and the FEM or FRM data. Table includes the average of the Channel A PM<sub>2.5</sub> data (A), mean bias error (MBE), normalized mean bias error (NMBE), slope and intercept (B=A\*s+i and AB=FM\*s+i), Pearson correlation (r), Spearman correlation (ρ), the number of 24-hr averages (N), and the percent of the dataset removed based on the 24-hr A B exclusion criteria (rem). Highlighted rows were removed because the A and B channels were more than 25% different on average after removing individual 24-hr averages that met the exclusion criteria.

| ID   | Before 24-hr point removal |      |       |       |    |       |       |                    |    |      |      | After 24-hr point removal |                |     |      |      |    |      |      |                    |    |      |      |      |     |
|------|----------------------------|------|-------|-------|----|-------|-------|--------------------|----|------|------|---------------------------|----------------|-----|------|------|----|------|------|--------------------|----|------|------|------|-----|
|      | A B compare                |      |       |       |    |       |       | FEM or FRM compare |    |      |      | N                         | A B comparison |     |      |      |    |      |      | FEM or FRM compare |    |      |      | N    | rem |
|      | A                          | MBE  | NMBE  | s     | i  | r     | ρ     | s                  | i  | r    | ρ    |                           | A              | MBE | NMBE | s    | i  | r    | ρ    | s                  | i  | r    | ρ    |      |     |
| avg  | 13                         | -3   | 3%    | 0.97  | 2  | 0.84  | 0.94  | 1.91               | 0  | 0.80 | 0.85 | 396                       | 11             | 0   | 2%   | 0.99 | 0  | 0.98 | 0.98 | 1.80               | -3 | 0.88 | 0.85 | 388  | 3%  |
| med  | 12                         | 0    | 4%    | 1.01  | 0  | 1.00  | 0.99  | 1.84               | -3 | 0.90 | 0.88 | 203                       | 12             | 0   | 4%   | 1.01 | 0  | 1.00 | 1.00 | 1.88               | -3 | 0.92 | 0.88 | 194  | 0%  |
| min  | 5                          | -216 | -181% | -0.28 | -1 | -0.10 | -0.06 | 0.03               | 10 | 0.00 | 0.38 | 3                         | 5              | -3  | -49% | 0.58 | -1 | 0.76 | 0.74 | 0.24               | 10 | 0.38 | 0.43 | 3    | 0%  |
| max  | 46                         | 40   | 150%  | 2.33  | 31 | 1.00  | 1.00  | 12.54              | 61 | 0.99 | 1.00 | 2476                      | 23             | 3   | 45%  | 1.26 | 3  | 1.00 | 1.00 | 3.49               | 8  | 0.99 | 1.00 | 2473 | 47% |
| AK1  | 10                         | 0    | -1%   | 0.97  | 0  | 1.00  | 0.99  | 2.24               | -4 | 1.00 | 0.93 | 126                       | 10             | 0   | -1%  | 0.97 | 0  | 1.00 | 0.99 | 2.24               | -4 | 1.00 | 0.93 | 126  | 0%  |
| AK2  | 14                         | 3    | 26%   | 1.04  | 3  | 0.51  | 0.69  | 0.62               | 4  | 0.68 | 0.82 | 71                        | 10             | -1  | -7%  | 0.82 | 1  | 0.86 | 0.89 | 0.59               | 3  | 0.85 | 0.88 | 54   | 24% |
| AK3  | 8                          | -7   | -57%  | 0.57  | 0  | 0.99  | 0.99  | 1.22               | -4 | 0.95 | 0.93 | 227                       | 5              | -3  | -49% | 0.66 | 0  | 0.99 | 0.99 | 1.00               | -4 | 0.95 | 0.92 | 205  | 10% |
| AK4  | 7                          | -2   | -21%  | 0.75  | 1  | 0.99  | 1.00  | 1.29               | -1 | 0.97 | 0.94 | 189                       | 7              | -2  | -21% | 0.75 | 1  | 0.99 | 1.00 | 1.29               | -1 | 0.97 | 0.94 | 189  | 0%  |
| AZ1  | 16                         | 0    | 3%    | 1.01  | 0  | 1.00  | 0.99  | 1.77               | -2 | 0.96 | 0.97 | 76                        | 16             | 0   | 3%   | 1.01 | 0  | 1.00 | 0.99 | 1.77               | -2 | 0.96 | 0.97 | 76   | 0%  |
| AZ3  | 10                         | 1    | 6%    | 1.02  | 0  | 1.00  | 1.00  | 1.68               | -6 | 0.90 | 0.88 | 385                       | 10             | 1   | 6%   | 1.02 | 0  | 1.00 | 1.00 | 1.68               | -6 | 0.90 | 0.88 | 384  | 0%  |
| AZ4  | 11                         | 1    | 7%    | 1.06  | 0  | 1.00  | 1.00  | 1.78               | -6 | 0.97 | 0.93 | 435                       | 11             | 1   | 7%   | 1.06 | 0  | 1.00 | 1.00 | 1.78               | -6 | 0.97 | 0.93 | 435  | 0%  |
| CA1  | 13                         | -1   | -10%  | 0.94  | -1 | 1.00  | 1.00  | 2.36               | -8 | 0.98 | 0.84 | 161                       | 13             | -1  | -10% | 0.94 | -1 | 1.00 | 1.00 | 2.36               | -8 | 0.98 | 0.84 | 161  | 0%  |
| CA10 | 8                          | 1    | 10%   | 1.08  | 0  | 1.00  | 1.00  | 1.40               | -2 | 0.80 | 0.73 | 393                       | 8              | 1   | 10%  | 1.08 | 0  | 1.00 | 1.00 | 1.40               | -2 | 0.80 | 0.73 | 393  | 0%  |
| CA13 | 8                          | 1    | 9%    | 1.09  | 0  | 1.00  | 1.00  | 1.51               | -5 | 0.80 | 0.77 | 619                       | 8              | 1   | 9%   | 1.09 | 0  | 1.00 | 1.00 | 1.51               | -5 | 0.80 | 0.77 | 619  | 0%  |
| CA16 | 12                         | -1   | -11%  | 0.93  | 0  | 1.00  | 0.99  | 1.00               | 4  | 0.69 | 0.59 | 183                       | 12             | -1  | -11% | 0.93 | 0  | 1.00 | 0.99 | 1.00               | 4  | 0.69 | 0.59 | 183  | 0%  |
| CA18 | 10                         | 0    | 1%    | 1.04  | 0  | 1.00  | 1.00  | 1.86               | -3 | 0.91 | 0.86 | 213                       | 10             | 0   | 1%   | 1.04 | 0  | 1.00 | 1.00 | 1.86               | -3 | 0.91 | 0.86 | 213  | 0%  |
| CA19 | 12                         | 1    | 6%    | 1.05  | 0  | 1.00  | 1.00  | 1.74               | -4 | 0.88 | 0.89 | 398                       | 12             | 1   | 6%   | 1.05 | 0  | 1.00 | 1.00 | 1.74               | -4 | 0.88 | 0.89 | 398  | 0%  |
| CA2  | 8                          | -1   | -9%   | 0.93  | 0  | 0.99  | 0.98  | 1.88               | -2 | 0.86 | 0.75 | 661                       | 8              | -1  | -9%  | 0.93 | 0  | 0.99 | 0.99 | 1.88               | -2 | 0.86 | 0.76 | 659  | 0%  |
| CA20 | 12                         | 0    | 4%    | 1.07  | 0  | 1.00  | 1.00  | 1.57               | -2 | 0.75 | 0.71 | 152                       | 12             | 0   | 4%   | 1.07 | 0  | 1.00 | 1.00 | 1.57               | -2 | 0.75 | 0.71 | 152  | 0%  |
| CA3  | 10                         | 2    | 24%   | 1.32  | 0  | 0.40  | 0.96  | 1.63               | 1  | 0.49 | 0.78 | 269                       | 9              | 1   | 14%  | 1.07 | 1  | 0.98 | 0.97 | 1.40               | 1  | 0.76 | 0.78 | 265  | 1%  |
| CA4  | 46                         | 40   | 150%  | 2.33  | 31 | 0.04  | 0.75  | 0.78               | 23 | 0.02 | 0.64 | 339                       | 9              | 2   | 23%  | 1.01 | 2  | 0.97 | 0.91 | 1.63               | 0  | 0.85 | 0.75 | 282  | 17% |
| CA5  | 9                          | 0    | 4%    | 1.02  | 0  | 0.98  | 0.98  | 0.93               | 3  | 0.65 | 0.75 | 246                       | 9              | 0   | 4%   | 1.02 | 0  | 0.98 | 0.98 | 0.93               | 3  | 0.65 | 0.75 | 246  | 0%  |
| CA6  | 5                          | -1   | -25%  | 0.93  | -1 | 0.94  | 0.87  | 0.83               | 1  | 0.69 | 0.77 | 88                        | 5              | -1  | -23% | 0.95 | -1 | 0.95 | 0.90 | 0.85               | 1  | 0.70 | 0.80 | 86   | 2%  |
| CA7  | 8                          | -5   | -49%  | 0.29  | 4  | 0.45  | 0.45  | 0.22               | 9  | 0.33 | 0.38 | 201                       | 9              | -3  | -27% | 0.58 | 2  | 0.76 | 0.75 | 0.24               | 8  | 0.38 | 0.43 | 129  | 36% |

|      |    |      |       |       |    |       |       |       |     |      |      |      |    |    |     |      |    |      |      |      |     |      |      |      |     |
|------|----|------|-------|-------|----|-------|-------|-------|-----|------|------|------|----|----|-----|------|----|------|------|------|-----|------|------|------|-----|
| CO1  | 8  | 1    | 8%    | 1.12  | 0  | 1.00  | 1.00  | 1.97  | -6  | 0.96 | 0.87 | 113  | 8  | 1  | 8%  | 1.12 | 0  | 1.00 | 1.00 | 1.97 | -6  | 0.96 | 0.87 | 113  | 0%  |
| DE1  | 11 | -1   | -7%   | 0.95  | 0  | 1.00  | 1.00  | 2.24  | -5  | 0.92 | 0.92 | 205  | 11 | -1 | -7% | 0.95 | 0  | 1.00 | 1.00 | 2.24 | -5  | 0.92 | 0.92 | 205  | 0%  |
| FL1  | 7  | 0    | -4%   | 0.98  | 0  | 1.00  | 1.00  | 0.99  | 0   | 0.69 | 0.81 | 119  | 7  | 0  | -4% | 0.98 | 0  | 1.00 | 1.00 | 0.99 | 0   | 0.69 | 0.81 | 119  | 0%  |
| GA1  | 16 | 1    | 8%    | 0.78  | 5  | 0.90  | 0.85  | 1.98  | -2  | 0.91 | 0.88 | 200  | 16 | 1  | 4%  | 0.85 | 3  | 0.94 | 0.93 | 2.10 | -3  | 0.92 | 0.90 | 184  | 8%  |
| IA1  | 14 | 1    | 6%    | 1.04  | 0  | 0.99  | 0.99  | 1.87  | -2  | 0.89 | 0.85 | 1869 | 14 | 1  | 6%  | 1.05 | 0  | 0.99 | 0.99 | 1.87 | -2  | 0.89 | 0.85 | 1865 | 0%  |
| IA10 | 41 | 26   | 92%   | 1.67  | 15 | 0.12  | 0.97  | 1.71  | 12  | 0.11 | 0.86 | 493  | 18 | 3  | 17% | 1.24 | -1 | 0.99 | 0.99 | 2.25 | -4  | 0.91 | 0.90 | 481  | 2%  |
| IA11 | 17 | 3    | 18%   | 1.25  | -1 | 0.99  | 0.99  | 2.23  | -4  | 0.93 | 0.9  | 1005 | 17 | 3  | 18% | 1.25 | -1 | 0.99 | 0.99 | 2.23 | -4  | 0.93 | 0.90 | 1005 | 0%  |
| IA12 | 14 | 0    | -1%   | 1.01  | 0  | 1.00  | 1.00  | 1.98  | -3  | 0.93 | 0.91 | 198  | 14 | 0  | -1% | 1.01 | 0  | 1.00 | 1.00 | 1.98 | -3  | 0.93 | 0.91 | 198  | 0%  |
| IA2  | 13 | -1   | -5%   | 0.89  | 1  | 0.98  | 0.98  | 1.81  | -1  | 0.89 | 0.85 | 1827 | 13 | -1 | -5% | 0.89 | 1  | 0.98 | 0.98 | 1.81 | -1  | 0.89 | 0.85 | 1827 | 0%  |
| IA3  | 12 | 1    | 6%    | 1.09  | 0  | 0.98  | 0.99  | 2.14  | -3  | 0.90 | 0.88 | 2476 | 12 | 1  | 6%  | 1.08 | 0  | 0.99 | 0.99 | 2.14 | -3  | 0.90 | 0.88 | 2473 | 0%  |
| IA4  | 12 | 1    | 13%   | 0.96  | 2  | 0.90  | 0.96  | 1.90  | -2  | 0.90 | 0.88 | 1013 | 12 | 2  | 16% | 1.10 | 1  | 0.96 | 0.97 | 1.88 | -2  | 0.91 | 0.88 | 999  | 1%  |
| IA8  | 14 | 1    | 4%    | 1.00  | 1  | 1.00  | 1.00  | 2.01  | -4  | 0.93 | 0.9  | 1031 | 14 | 1  | 4%  | 1.00 | 1  | 1.00 | 1.00 | 2.01 | -4  | 0.93 | 0.90 | 1031 | 0%  |
| IA9  | 15 | 1    | 10%   | 1.12  | 0  | 0.99  | 0.99  | 1.97  | -3  | 0.93 | 0.9  | 1028 | 15 | 1  | 10% | 1.12 | 0  | 0.99 | 0.99 | 1.97 | -3  | 0.93 | 0.90 | 1028 | 0%  |
| KS1  | 12 | 0    | 1%    | 1.02  | 0  | 1.00  | 1.00  | 1.72  | -3  | 0.95 | 0.94 | 124  | 12 | 0  | 1%  | 1.02 | 0  | 1.00 | 1.00 | 1.72 | -3  | 0.95 | 0.94 | 124  | 0%  |
| KS2  | 13 | 2    | 14%   | 0.99  | 2  | 0.57  | 0.97  | 1.67  | -2  | 0.77 | 0.91 | 113  | 12 | 1  | 5%  | 1.04 | 0  | 1.00 | 1.00 | 1.74 | -4  | 0.95 | 0.94 | 111  | 2%  |
| KS3  | 12 | 0    | -3%   | 0.98  | 0  | 1.00  | 1.00  | 1.79  | -4  | 0.95 | 0.92 | 71   | 12 | 0  | -3% | 0.98 | 0  | 1.00 | 1.00 | 1.79 | -4  | 0.95 | 0.92 | 71   | 0%  |
| MT1  | 23 | 0    | 0%    | 0.99  | 0  | 1.00  | 1.00  | 3.22  | -10 | 0.98 | 0.98 | 8    | 23 | 0  | 0%  | 0.99 | 0  | 1.00 | 1.00 | 3.22 | -10 | 0.98 | 0.98 | 8    | 0%  |
| NC4  | 15 | 1    | 6%    | 1.04  | 0  | 0.82  | 0.95  | 2.10  | -3  | 0.85 | 0.92 | 715  | 14 | 1  | 4%  | 1.00 | 1  | 0.96 | 0.97 | 2.06 | -2  | 0.90 | 0.92 | 700  | 2%  |
| OK1  | 11 | 2    | 22%   | 1.19  | 1  | 0.90  | 0.87  | 1.36  | -3  | 0.86 | 0.82 | 127  | 11 | 2  | 18% | 1.26 | -1 | 0.97 | 0.96 | 1.38 | -3  | 0.86 | 0.81 | 120  | 6%  |
| OK3  | 15 | 1    | 5%    | 1.06  | 0  | 1.00  | 1.00  | 1.19  | 5   | 0.77 | 0.8  | 70   | 15 | 1  | 5%  | 1.06 | 0  | 1.00 | 1.00 | 1.19 | 5   | 0.77 | 0.80 | 70   | 0%  |
| VA1  | 12 | 0    | -3%   | 0.97  | 0  | 1.00  | 1.00  | 2.32  | -3  | 0.97 | 0.86 | 30   | 12 | 0  | -3% | 0.97 | 0  | 1.00 | 1.00 | 2.32 | -3  | 0.97 | 0.86 | 30   | 0%  |
| VT1  | 10 | 0    | 5%    | 1.03  | 0  | 1.00  | 1.00  | 2.15  | -5  | 0.96 | 0.95 | 146  | 10 | 0  | 5%  | 1.03 | 0  | 1.00 | 1.00 | 2.15 | -5  | 0.96 | 0.95 | 146  | 0%  |
| WA1  | 11 | 0    | 4%    | 1.07  | 0  | 1.00  | 1.00  | 1.90  | -4  | 0.92 | 0.85 | 561  | 11 | 0  | 4%  | 1.07 | 0  | 1.00 | 1.00 | 1.90 | -4  | 0.92 | 0.85 | 561  | 0%  |
| WA2  | 12 | -216 | -181% | 0.00  | 12 | 0.02  | 0.97  | 12.54 | 61  | 0.09 | 0.8  | 246  | 12 | 0  | -2% | 0.99 | 0  | 1.00 | 0.99 | 3.49 | -4  | 0.84 | 0.81 | 235  | 4%  |
| WA3  | 15 | -39  | -112% | 0.00  | 15 | -0.03 | 0.94  | 0.03  | 35  | 0.00 | 0.87 | 243  | 16 | -1 | -5% | 0.95 | 0  | 1.00 | 0.99 | 2.25 | -3  | 0.97 | 0.93 | 239  | 2%  |
| WA5  | 9  | 8    | 143%  | -0.28 | 10 | -0.10 | -0.06 | 0.58  | 1   | 0.76 | 0.63 | 338  | 5  | 2  | 45% | 0.65 | 3  | 0.89 | 0.74 | 0.71 | 1   | 0.46 | 0.43 | 179  | 47% |
| WI1  | 11 | 0    | 3%    | 1.00  | 0  | 1.00  | 1.00  | 2.11  | -5  | 0.93 | 0.94 | 115  | 11 | 0  | 3%  | 1.00 | 0  | 1.00 | 1.00 | 2.11 | -5  | 0.93 | 0.94 | 115  | 0%  |
| WI2  | 13 | 2    | 19%   | 1.03  | 2  | 0.54  | 0.98  | 2.03  | -3  | 0.74 | 0.93 | 454  | 12 | 1  | 11% | 1.09 | 0  | 1.00 | 1.00 | 2.09 | -4  | 0.95 | 0.95 | 450  | 1%  |
| WI3  | 9  | 0    | -5%   | 0.94  | 0  | 1.00  | 1.00  | 2.64  | -8  | 0.99 | 0.99 | 12   | 9  | 0  | -5% | 0.94 | 0  | 1.00 | 1.00 | 2.64 | -8  | 0.99 | 0.99 | 12   | 0%  |
| WI4  | 11 | 0    | -1%   | 0.95  | 0  | 1.00  | 1.00  | 2.24  | -4  | 0.92 | 0.88 | 185  | 11 | 0  | -1% | 0.95 | 0  | 1.00 | 1.00 | 2.24 | -4  | 0.92 | 0.88 | 185  | 0%  |
| WI5  | 6  | 0    | 3%    | 1.02  | 0  | 1.00  | 1.00  | 2.04  | -4  | 0.99 | 1    | 3    | 6  | 0  | 3%  | 1.02 | 0  | 1.00 | 1.00 | 2.04 | -4  | 0.99 | 1.00 | 3    | 0%  |
| WI6  | 17 | 0    | -2%   | 0.96  | 0  | 0.99  | 0.99  | 2.37  | -8  | 0.92 | 0.88 | 46   | 17 | 0  | -2% | 0.96 | 0  | 0.99 | 0.99 | 2.37 | -8  | 0.92 | 0.88 | 46   | 0%  |

Table S7. Performance by data cleaning methods and corrections. Data cleaning methods include excluding 24-hr averages where <90% of measurements are available (completeness), comparison of the A and B channels where data is excluded when the A and B channels are different by both 5  $\mu\text{g m}^{-3}$  and 60% (AB), and the removal of 3 sensors that had poor agreement in the A and B channel after excluding 24-hr problematic points (problem sensors, details in section 4.1). Performance is compared for the individual channels (i.e. A, B) and also as the average of the A and B channels (AB-shaded rows). Statistics include the percent mean bias error (PMBE=MBE/average FM) linear regression slope (s) and intercept (i), and Lin's concordance correlation coefficient (CCC).

| QA criteria         | Correction                              | Channels  | RMSE<br>( $\mu\text{g m}^{-3}$ ) | MAE<br>( $\mu\text{g m}^{-3}$ ) | MBE<br>( $\mu\text{g m}^{-3}$ ) | PMBE<br>(%) | s    | i  | R <sup>2</sup> | Pearson<br>r | Spearman<br>$\rho$ | CCC  | N     | Mean<br>FM<br>( $\mu\text{g m}^{-3}$ ) | Mean<br>PA<br>( $\mu\text{g m}^{-3}$ ) |
|---------------------|-----------------------------------------|-----------|----------------------------------|---------------------------------|---------------------------------|-------------|------|----|----------------|--------------|--------------------|------|-------|----------------------------------------|----------------------------------------|
| None                | None                                    | AB cf_atm | 155                              | 17                              | 16                              | 194%        | 0.99 | 16 | 0              | 0.04         | 0.8                | 0    | 56541 | 8                                      | 24                                     |
|                     | None                                    | AB cf_1   | 99                               | 11                              | 10                              | 121%        | 1.24 | 8  | 0.01           | 0.08         | 0.83               | 0.01 | 56541 | 8                                      | 18                                     |
|                     | US                                      | A         | 87                               | 7                               | 5                               | 60%         | 0.87 | 6  | 0              | 0.06         | 0.85               | 0.01 | 55299 | 8                                      | 13                                     |
|                     | US                                      | B         | 161                              | 12                              | 8                               | 102%        | 0.28 | 14 | 0              | 0.01         | 0.7                | 0    | 55299 | 8                                      | 16                                     |
|                     | US                                      | AB        | 92                               | 9                               | 7                               | 81%         | 0.57 | 10 | 0              | 0.04         | 0.8                | 0.01 | 55299 | 8                                      | 15                                     |
|                     | LRAPA                                   | AB        | 49                               | 5                               | 0                               | 2%          | 0.62 | 3  | 0.01           | 0.08         | 0.83               | 0.02 | 56541 | 8                                      | 8                                      |
|                     | AQ&U<br>Woodsmoke<br>(Robinson<br>2020) | AB        | 77                               | 9                               | 8                               | 104%        | 0.97 | 9  | 0.01           | 0.08         | 0.83               | 0.01 | 56541 | 8                                      | 17                                     |
| Completeness        | None                                    | AB cf_atm | 64                               | 7                               | 6                               | 80%         | 1.49 | 2  | 0.02           | 0.13         | 0.82               | 0.02 | 20721 | 8                                      | 14                                     |
|                     | None                                    | AB cf_1   | 43                               | 6                               | 5                               | 65%         | 1.27 | 3  | 0.03           | 0.16         | 0.82               | 0.04 | 20721 | 8                                      | 13                                     |
|                     | US                                      | A         | 30                               | 3                               | 1                               | 11%         | 0.9  | 2  | 0.03           | 0.16         | 0.86               | 0.06 | 20554 | 8                                      | 9                                      |
|                     | US                                      | B         | 69                               | 4                               | 2                               | 20%         | 0.86 | 3  | 0              | 0.07         | 0.84               | 0.01 | 20554 | 8                                      | 9                                      |
|                     | US                                      | AB        | 38                               | 3                               | 1                               | 16%         | 0.88 | 2  | 0.02           | 0.13         | 0.86               | 0.04 | 20554 | 8                                      | 9                                      |
| AB                  | None                                    | AB cf_atm | 9                                | 6                               | 5                               | 64%         | 1.8  | -1 | 0.71           | 0.84         | 0.84               | 0.56 | 52108 | 8                                      | 13                                     |
|                     | None                                    | AB cf_1   | 9                                | 6                               | 5                               | 64%         | 1.57 | 1  | 0.66           | 0.81         | 0.85               | 0.56 | 52108 | 8                                      | 13                                     |
|                     | US                                      | A         | 4                                | 2                               | 1                               | 8%          | 1.09 | 0  | 0.71           | 0.84         | 0.87               | 0.81 | 50866 | 8                                      | 9                                      |
|                     | US                                      | B         | 3                                | 2                               | 0                               | -2%         | 1.03 | 0  | 0.74           | 0.86         | 0.86               | 0.84 | 50866 | 8                                      | 8                                      |
|                     | US                                      | AB        | 4                                | 2                               | 0                               | 3%          | 1.06 | 0  | 0.73           | 0.86         | 0.87               | 0.84 | 50866 | 8                                      | 8                                      |
| AB,<br>completeness | None                                    | AB cf_atm | 9                                | 6                               | 5                               | 67%         | 1.56 | 1  | 0.66           | 0.81         | 0.86               | 0.56 | 46598 | 8                                      | 13                                     |
|                     | None                                    | AB cf_1   | 9                                | 6                               | 5                               | 67%         | 1.78 | -1 | 0.71           | 0.84         | 0.85               | 0.56 | 46598 | 8                                      | 13                                     |
|                     | US                                      | A         | 3                                | 2                               | 1                               | 6%          | 0.97 | 1  | 0.72           | 0.85         | 0.88               | 0.84 | 45374 | 8                                      | 9                                      |
|                     | US                                      | B         | 3                                | 2                               | 0                               | -3%         | 0.91 | 1  | 0.75           | 0.86         | 0.88               | 0.86 | 45374 | 8                                      | 8                                      |
|                     | US                                      | AB        | 3                                | 2                               | 0                               | 2%          | 0.94 | 1  | 0.74           | 0.86         | 0.88               | 0.86 | 45374 | 8                                      | 8                                      |
| None                | None                                    | AB cf_atm | 8                                | 5                               | 4                               | 53%         | 1.69 | -1 | 0.73           | 0.86         | 0.83               | 0.61 | 20293 | 8                                      | 12                                     |
|                     | None                                    | AB cf_1   | 7                                | 5                               | 4                               | 48%         | 1.45 | 0  | 0.7            | 0.84         | 0.83               | 0.64 | 20293 | 8                                      | 12                                     |

|                 |                                 |    |   |   |    |      |      |    |      |      |      |      |       |   |    |
|-----------------|---------------------------------|----|---|---|----|------|------|----|------|------|------|------|-------|---|----|
|                 | US                              | A  | 3 | 2 | 0  | -1%  | 0.89 | 1  | 0.74 | 0.86 | 0.86 | 0.86 | 20126 | 8 | 8  |
|                 | US                              | B  | 3 | 2 | 0  | -5%  | 0.89 | 0  | 0.78 | 0.88 | 0.87 | 0.88 | 20126 | 8 | 7  |
|                 | US                              | AB | 3 | 2 | 0  | -3%  | 0.89 | 1  | 0.77 | 0.88 | 0.87 | 0.88 | 20126 | 8 | 8  |
| AB,             | LRAPA                           | AB | 4 | 3 | -3 | -34% | 0.72 | -1 | 0.7  | 0.84 | 0.83 | 0.72 | 20293 | 8 | 5  |
| completeness,   | AQ&U                            | AB | 6 | 4 | 4  | 49%  | 1.13 | 3  | 0.7  | 0.84 | 0.83 | 0.67 | 20293 | 8 | 12 |
| problem sensors | Woodsmoke<br>(Robinson<br>2020) | AB | 3 | 2 | -1 | -12% | 0.80 | 1  | 0.70 | 0.84 | 0.83 | 0.82 | 20293 | 8 | 7  |

Table S8. Summary of the performance parameters for the full dataset correction, and corrections built and tested using leave one state out (LOSO) and leaving out 12 random weeks, leave out by date (LOBD). Spearman correlation, root mean squared error (RMSE), and mean bias error (MBE) are summarized as median (min, max). MBE for “ALL” does not improve since building a model on the full dataset and applying it will always result in an MBE of 0 whether it is a linear or more complex model.

| Correction Model | Dataset | R <sup>2</sup><br>(Train dataset) | Spearman                      | RMSE (µg m <sup>-3</sup> )<br>(Test dataset) | MBE (µg m <sup>-3</sup> )<br>(Test dataset) | MAE (µg m <sup>-3</sup> )<br>(Test dataset) |
|------------------|---------|-----------------------------------|-------------------------------|----------------------------------------------|---------------------------------------------|---------------------------------------------|
|                  |         |                                   | correlation<br>(Test dataset) |                                              |                                             |                                             |
| 0Raw             | ALL     |                                   | 0.86                          | 7.5                                          | 4.3                                         | 5.3                                         |
| 1Linear          | ALL     | 0.78                              | 0.86                          | 2.9                                          | 0                                           | 2.1                                         |
| 2+RH             | ALL     | 0.83                              | 0.89                          | 2.5                                          | 0                                           | 1.7                                         |
| 3+D*T            | ALL     | 0.83                              | 0.9                           | 2.5                                          | 0                                           | 1.8                                         |
| 4+RH*T*D         | ALL     | 0.84                              | 0.9                           | 2.5                                          | 0                                           | 1.7                                         |
| 5PM*RH           | ALL     | 0.84                              | 0.9                           | 2.5                                          | 0                                           | 1.7                                         |
| 6PM*RH*T         | ALL     | 0.84                              | 0.9                           | 2.5                                          | 0                                           | 1.7                                         |
| 7PM*RH*D*T       | ALL     | 0.84                              | 0.9                           | 2.4                                          | 0                                           | 1.7                                         |
| 0Raw             | LOBD    |                                   | 0.85 (0.59,0.94)              | 7.4 (4.4,12.7)                               | 4.2 (1.4,8.8)                               | 5.2 (3.1,9.4)                               |
| 1Linear          | LOBD    | 0.78 (0.75,0.8)                   | 0.85 (0.59,0.94)              | 2.9 (2,6.1)                                  | 0 (-1.3,2.3)                                | 2.1 (1.5,3.6)                               |
| 2+RH             | LOBD    | 0.83 (0.81,0.85)                  | 0.89 (0.76,0.95)              | 2.5 (1.8,5.5)                                | 0 (-0.9,1.3)                                | 1.8 (1.4,3.2)                               |
| 3+D*T            | LOBD    | 0.83 (0.81,0.85)                  | 0.89 (0.74,0.95)              | 2.5 (1.8,5.5)                                | 0 (-0.9,1.3)                                | 1.8 (1.4,3.3)                               |
| 4+RH*T*D         | LOBD    | 0.84 (0.81,0.85)                  | 0.89 (0.76,0.95)              | 2.5 (1.8,5.4)                                | 0 (-1,1.2)                                  | 1.8 (1.4,3.2)                               |
| 5PM*RH           | LOBD    | 0.84 (0.81,0.85)                  | 0.89 (0.77,0.95)              | 2.5 (1.7,4.9)                                | 0 (-0.8,1.4)                                | 1.7 (1.3,3)                                 |
| 6PM*RH*T         | LOBD    | 0.84 (0.82,0.85)                  | 0.89 (0.77,0.95)              | 2.5 (1.7,4.7)                                | 0 (-0.9,1.3)                                | 1.7 (1.3,2.9)                               |
| 7PM*RH*D*T       | LOBD    | 0.84 (0.82,0.86)                  | 0.89 (0.77,0.95)              | 2.5 (1.7,74.6)                               | 0 (-2.8,2.8)                                | 1.7 (1.3,6.6)                               |
| 0Raw             | LOSO    |                                   | 0.9 (0.71,0.98)               | 5.5 (3.2,12.9)                               | 2.8 (-0.3,11.3)                             | 4.1 (2.1,11.3)                              |
| 1Linear          | LOSO    | 0.78 (0.73,0.81)                  | 0.9 (0.71,0.98)               | 3 (1,4.1)                                    | -0.3 (-2.4,3.2)                             | 2.0 (0.9,3.3)                               |
| 2+RH             | LOSO    | 0.83 (0.78,0.85)                  | 0.92 (0.78,0.98)              | 2.1 (1,3.8)                                  | -0.5 (-3,2.8)                               | 1.6 (0.9,3.0)                               |
| 3+D*T            | LOSO    | 0.83 (0.79,0.85)                  | 0.91 (0.76,0.98)              | 2.3 (1.2,3.6)                                | -0.5 (-2,2.5)                               | 1.7 (1,2.6)                                 |
| 4+RH*T*D         | LOSO    | 0.84 (0.79,0.85)                  | 0.91 (0.77,0.98)              | 2.4 (1.1,3.6)                                | -0.3 (-2.7,2.5)                             | 1.7 (0.9,2.8)                               |
| 5PM*RH           | LOSO    | 0.84 (0.79,0.86)                  | 0.93 (0.79,0.98)              | 2.1 (1,3.7)                                  | -0.5 (-2.8,2.6)                             | 1.6 (0.8,2.8)                               |
| 6PM*RH*T         | LOSO    | 0.84 (0.79,0.86)                  | 0.92 (0.78,0.98)              | 2.2 (1,3.9)                                  | -0.4 (-2.9,2.5)                             | 1.7 (0.9,2.9)                               |
| 7PM*RH*D*T       | LOSO    | 0.84 (0.8,0.87)                   | 0.92 (0.77,0.98)              | 2.4 (1.1,10.1)                               | -0.3 (-3.2,2.1)                             | 1.8 (0.9,3.3)                               |

Table S9. Significant difference between performance statistics on the test datasets (as summarized in Table S8) summarized as significantly “improve”, “worsen”, or no change “—”. A Shapiro test was first used to determine whether the metrics were likely normally or non-normally distributed. Most of the LOBD metrics were non-normally distributed while most of the LOSO statistics were normally distributed. Wilcoxon signed rank tests were used for the non-normally distributed comparisons while t-test (paired, 2 tailed) were run for the normally distributed metrics. For tests where results were marginal, both tests were run. We compare the raw to linear corrected metrics (ORaw: 1lin) and see significant improvement across most, next we compare the linear to additive RH model (1Lin: 2+RH) and see significant improvement across most metrics. Next, we compare the additive RH model to the 3:D\*T model, it does not significantly change the LOSO metrics and improves some and worsens some of the LOBD metrics and so we determine that it is not a better model. Then we compare the additive RH (2) model to the additive T\*RH\*D model (4) and it does not significantly improve metrics. Then we compare the additive RH model to the multiplicative RH model (2+RH:4:PM\*RH) finding no improvement in most of the LOSO metrics suggesting it is not a significantly better model. Lastly, we do the same with the additive RH model and PM\*RH\*T model which shows no LOSO metric improvement. In the end the additive RH model appears to provide the most significant improvement.

|      |          | 0:1     | 1:2                    | 2:3    | 2:4    | 2:5                       | 5:6    | 5:7    | 4:5     | 1:5     |
|------|----------|---------|------------------------|--------|--------|---------------------------|--------|--------|---------|---------|
| LOBD | MAE      | improve | improve                | worsen | worse  | improve                   | --     | worsen | improve | improve |
|      |          |         | - (t-test significant) |        | worsen | --                        | worsen | worsen |         | improve |
|      | MBE      | improve |                        | worsen |        |                           |        |        | improve |         |
|      | RMSE     | improve | improve                | --     | --     | improve                   | --     | --     | --      | improve |
|      | spearman | --      | improve                | --     | --     | improve                   | --     | --     | --      | improve |
| LOSO | MAE      | improve | --                     | --     | --     | improve (t-test & wilcox) | --     | --     | --      | --      |
|      | MBE      | improve | --                     | --     | --     | --                        | --     | --     | --      | --      |
|      | RMSE     | improve | improve (not t-test)   | --     | --     | --                        | --     | --     | --      | improve |
|      | spearman | --      | --                     | --     | --     | --                        | --     | --     | --      | --      |



Table S10. Summary of correction parameters built and tested using leave one site out (LOSO) and leaving out 12 random weeks, leave out by date (LOBD). The results of the multiple model builds are reported as median (min, max) where i is the intercept and s<sub>1</sub>-s<sub>15</sub> are the coefficients for the increasingly complex models as defined in the 7 proposed correction equations (Section 4.1.2).

| Model      | withholding | i                                 | s1                                | s2                               | s3                                  | s4                                 | s5                               | s6                           | s7                           | s8                             |
|------------|-------------|-----------------------------------|-----------------------------------|----------------------------------|-------------------------------------|------------------------------------|----------------------------------|------------------------------|------------------------------|--------------------------------|
| 1Linear    | LOBD        | -3<br>(-3,-3)                     | 1.91<br>(1.84,1.95)               |                                  |                                     |                                    |                                  |                              |                              |                                |
| 2+RH       | LOBD        | -11<br>(-11,-10)                  | 1.91<br>(1.85,1.94)               | 0.16<br>(0.16,0.17)              |                                     |                                    |                                  |                              |                              |                                |
| 3+D*T      | LOBD        | 2<br>(1,3)                        | 1.92<br>(1.86,1.95)               | 0.47<br>(0.39,0.51)              | -0.37<br>(-0.4,-0.33)               | -0.006<br>(-0.007,-0.002)          |                                  |                              |                              |                                |
| 4+RH*T*D   | LOBD        | -40<br>(-47,-32)                  | 1.91<br>(1.84,1.95)               | 0.44<br>(0.37,0.51)              | 0.53<br>(0.38,0.67)                 | -0.37<br>(-0.823,-0.083)           | 0.021<br>(0.015,0.026)           | -0.0249<br>(-0.0292,-0.0205) | -0.0151<br>(-0.0209,-0.003)  | 0.00021<br>(4e-05,0.00034)     |
| 5PM*RH     | LOBD        | -2<br>(-8,-4)                     | 0.87<br>(1.02,1.55)               | 0<br>(0.04,0.11)                 | -0.25<br>(0.01,0.02)                | 0.019                              | 0.028                            | 0.0042                       | -5e-04                       |                                |
| 6PM*RH*T   | LOBD        | -3<br>(-6,1)                      | -3.4<br>(0.36,1.35)               | 0.02<br>(-0.05,0.06)             | -0.14<br>(-0.35,-0.01)              | -0.266<br>(0.012,0.027)            | 0.058<br>(-0.003,0.044)          | 0.096<br>(2e-04, 0.0058)     | 0.0019<br>(-7e-04, 0)        | -0.05622                       |
| 7PM*RH*D*T | LOBD        | -3<br>(-48,16)                    | 1.91<br>(-7.06,4.5)               | 0.16<br>(-0.18,0.46)             | -0.37<br>(-0.53,0.87)               | -0.006<br>(-1.502,0.506)           | 0.021<br>(-0.02,0.095)           | -0.0249<br>(-0.0805,0.1668)  | -0.0147<br>(-0.0085,0.0265)  | 0.00021<br>(-0.18023,0.16455)  |
| 1Linear    | LOSO        | -3<br>(-3,-3)                     | 1.91<br>(1.72,1.98)               |                                  |                                     |                                    |                                  |                              |                              |                                |
| 2+RH       | LOSO        | -11<br>(-11,-10)                  | 1.91<br>(1.77,1.97)               | 0.16<br>(0.14,0.17)              |                                     |                                    |                                  |                              |                              |                                |
| 3+D*T      | LOSO        | 2<br>(1,2)                        | 1.92<br>(1.79,1.98)               | 0.47<br>(0.41,0.52)              | -0.37<br>(-0.39,-0.29)              | -0.006<br>(-0.007,-0.003)          |                                  |                              |                              |                                |
| 4+RH*T*D   | LOSO        | -40<br>(-46,-28)                  | 1.91<br>(1.79,1.97)               | 0.44<br>(0.31,0.5)               | 0.53<br>(0.28,0.64)                 | -0.39<br>(-0.766,0.045)            | 0.021<br>(0.014,0.025)           | -0.0249<br>(-0.0264,-0.02)   | -0.0147<br>(-0.0224,-0.0066) | 0.00021<br>(6e-05,0.00033)     |
| 5PM*RH     | LOSO        | -2<br>(-8,-6)                     | 0.87<br>(1.24,1.52)               | 0<br>(0.05,0.1)                  | -0.25<br>(0.01,0.01)                | 0.019                              | 0.028                            | 0.0042                       | -5e-04                       |                                |
| 6PM*RH*T   | LOSO        | -4<br>(-4,0)                      | -3.38<br>(0.5,1.28)               | 0.03<br>(-0.04,0.04)             | -0.13<br>(-0.33,-0.14)              | -0.285<br>(0.013,0.024)            | 0.057<br>(0.01,0.041)            | 0.095<br>(0.0029,0.0062)     | 0.002<br>(-8e-04,-3e-04)     | -0.05561                       |
| 7PM*RH*D*T | LOSO        | -4<br>(-28,2)                     | -3.38<br>(-4.55,1.73)             | 0.03<br>(-0.06,0.27)             | -0.13<br>(-0.27,0.51)               | -0.285<br>(-0.905,0.154)           | 0.057<br>(0.008,0.069)           | 0.095<br>(-0.0274,0.1186)    | 0.002<br>(-0.0014,0.014)     | -0.05561<br>(-0.13135,0.08928) |
| Model      | withholding | s9                                | s10                               | s11                              | s12                                 | s13                                | s14                              | s15                          |                              |                                |
| 7PM*RH*D*T | LOBD        | 0.00594<br>(-0.01764,<br>0.01417) | 0.00277<br>(-0.014,<br>0.01094)   | 0.00304<br>(-0.00143,<br>0.0051) | -0.00407<br>(-0.00592,<br>0.00017)  | -0.00133<br>(-0.00261,<br>0.00104) | -6e-05<br>(-0.00021,<br>0.00023) | 2e-05<br>(-2e-05,<br>5e-05)  |                              |                                |
| 7PM*RH*D*T | LOSO        | 0.00576<br>(-0.00879,<br>0.01465) | 0.00265<br>(-0.00625,<br>0.01252) | 0.00303<br>(0.00027,<br>0.00367) | -0.00406<br>(-0.00513,<br>-0.00122) | -0.00133<br>(-0.00169,<br>0.00023) | -6e-05<br>(-0.00023,<br>8e-05)   | 2e-05<br>(0,<br>2e-05)       |                              |                                |

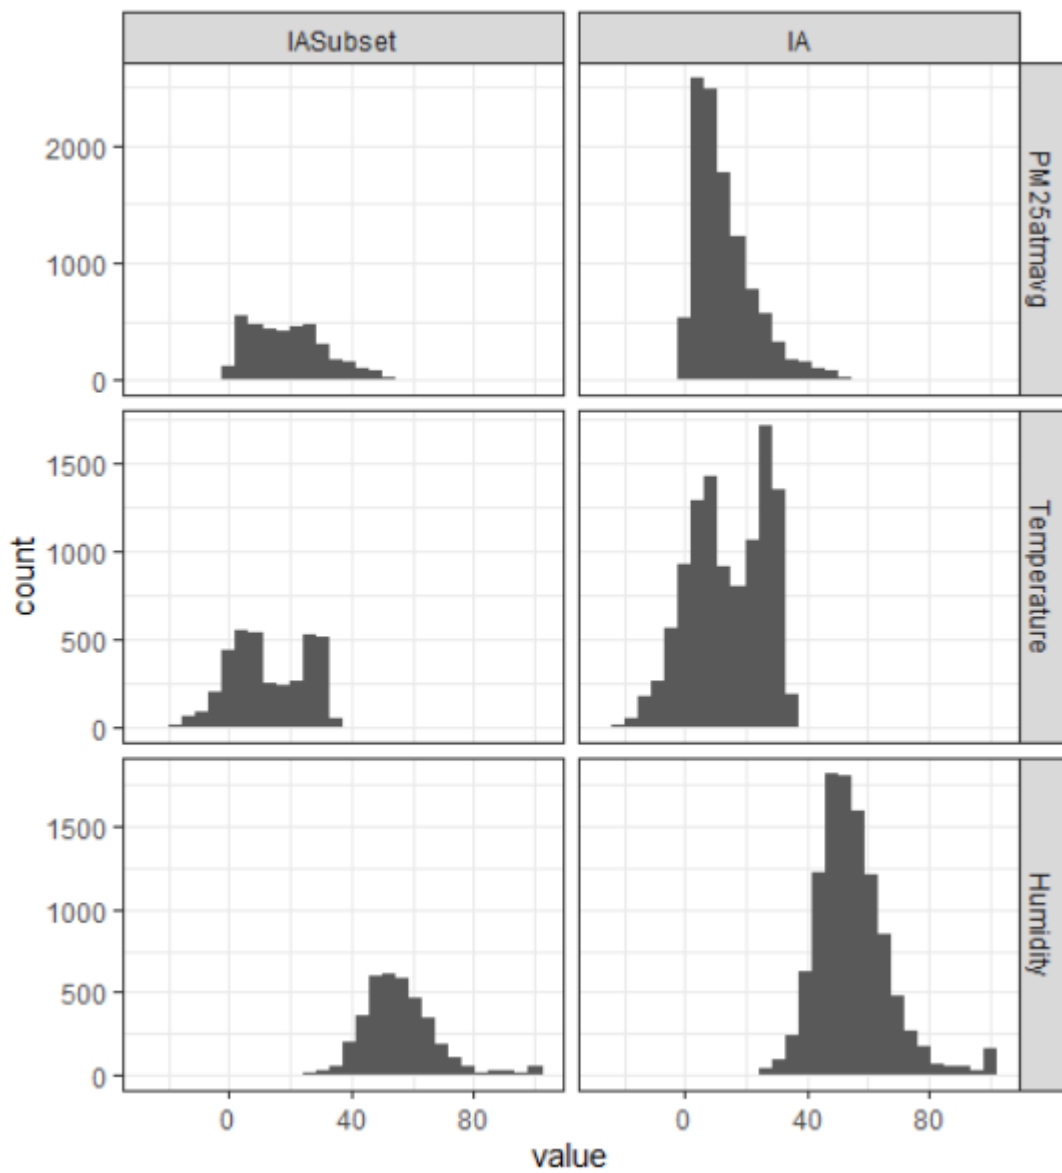

Figure S1. Distribution of subset of Iowa data used in the analysis and the full set of data from Iowa.

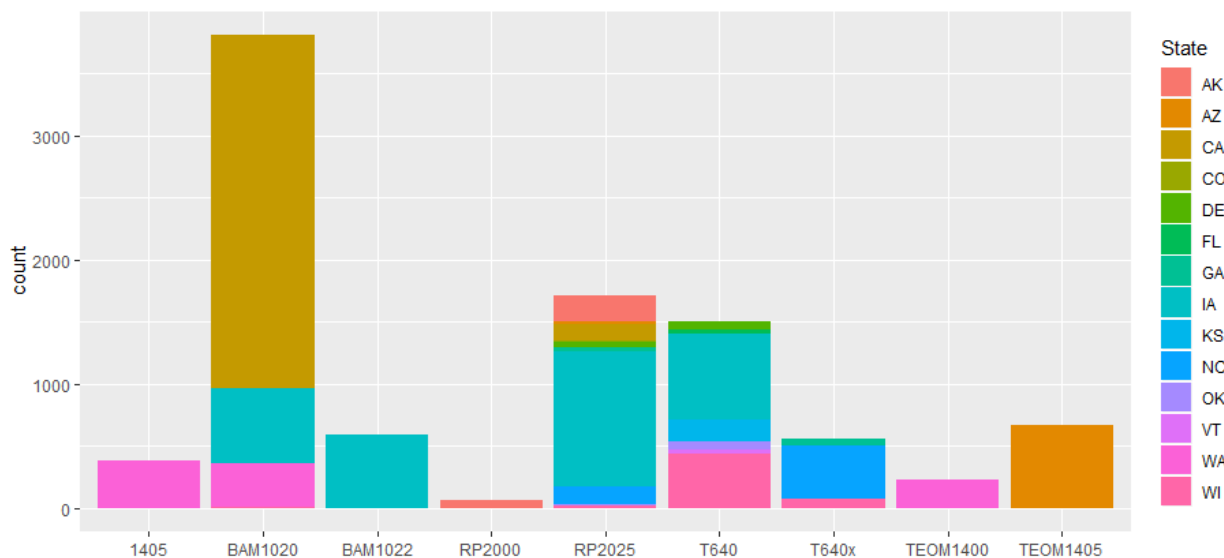

Figure S2. Frequency of FEM and FRM types (random sample from IA taken so equivalent points to CA)

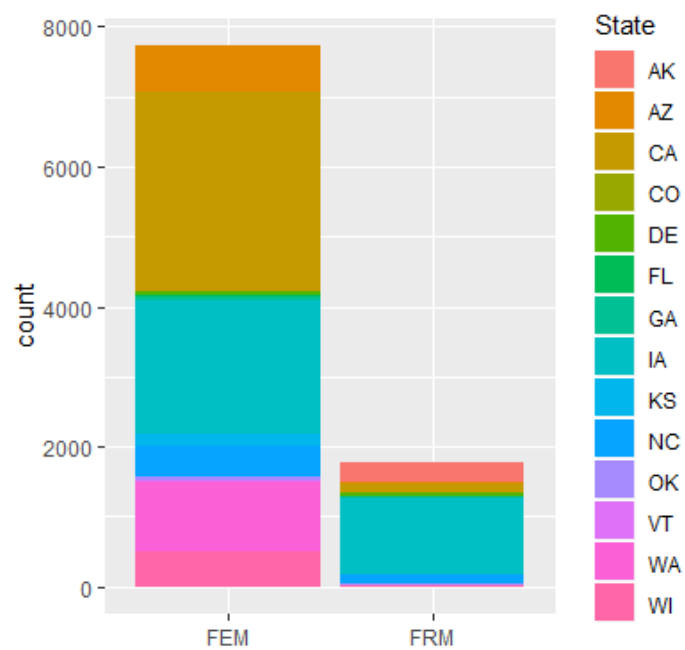

Figure S3. 24-hr paired measurements by FEM and FRM by state. (Random sample from IA taken so equivalent points to CA)

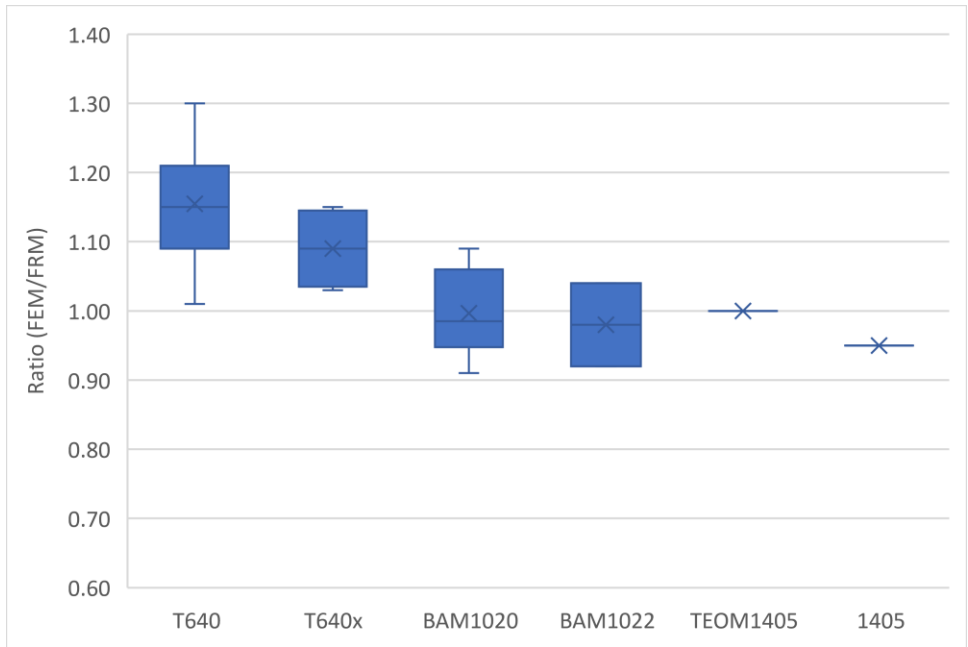

Figure S4. Ratios of FEM/FRM by monitor type included in PurpleAir correction dataset.

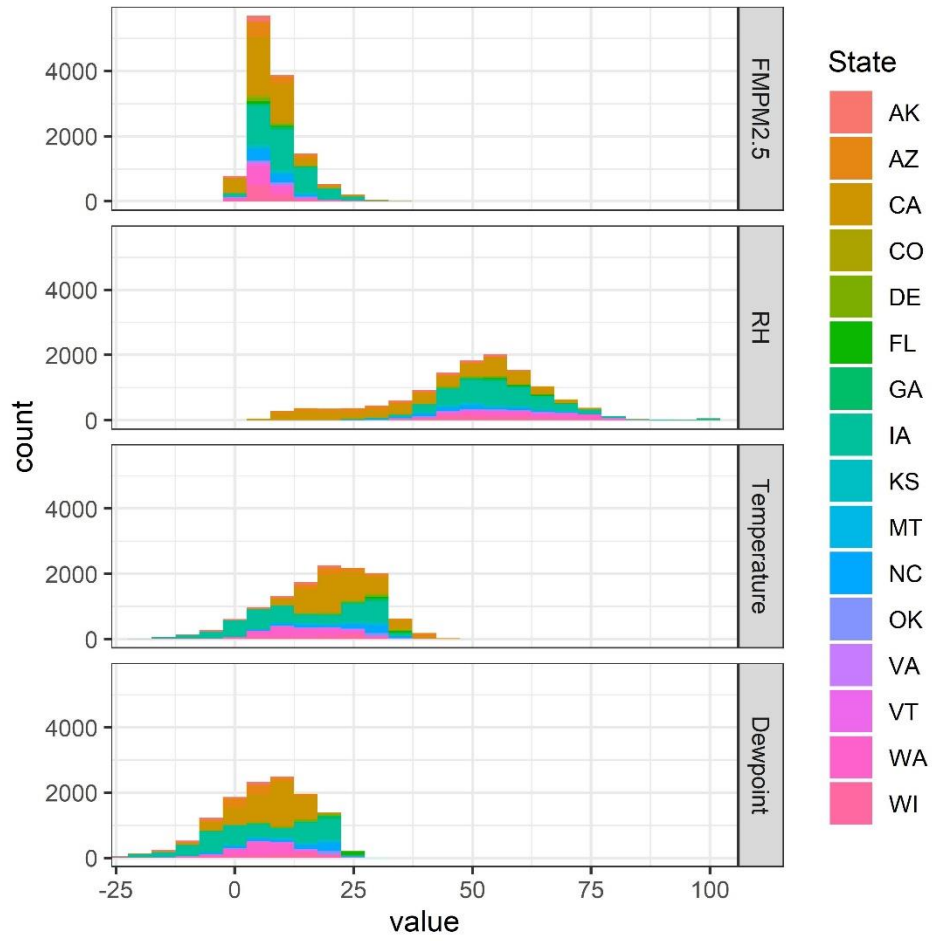

Figure S5. Distribution of full dataset after subsetting Iowa

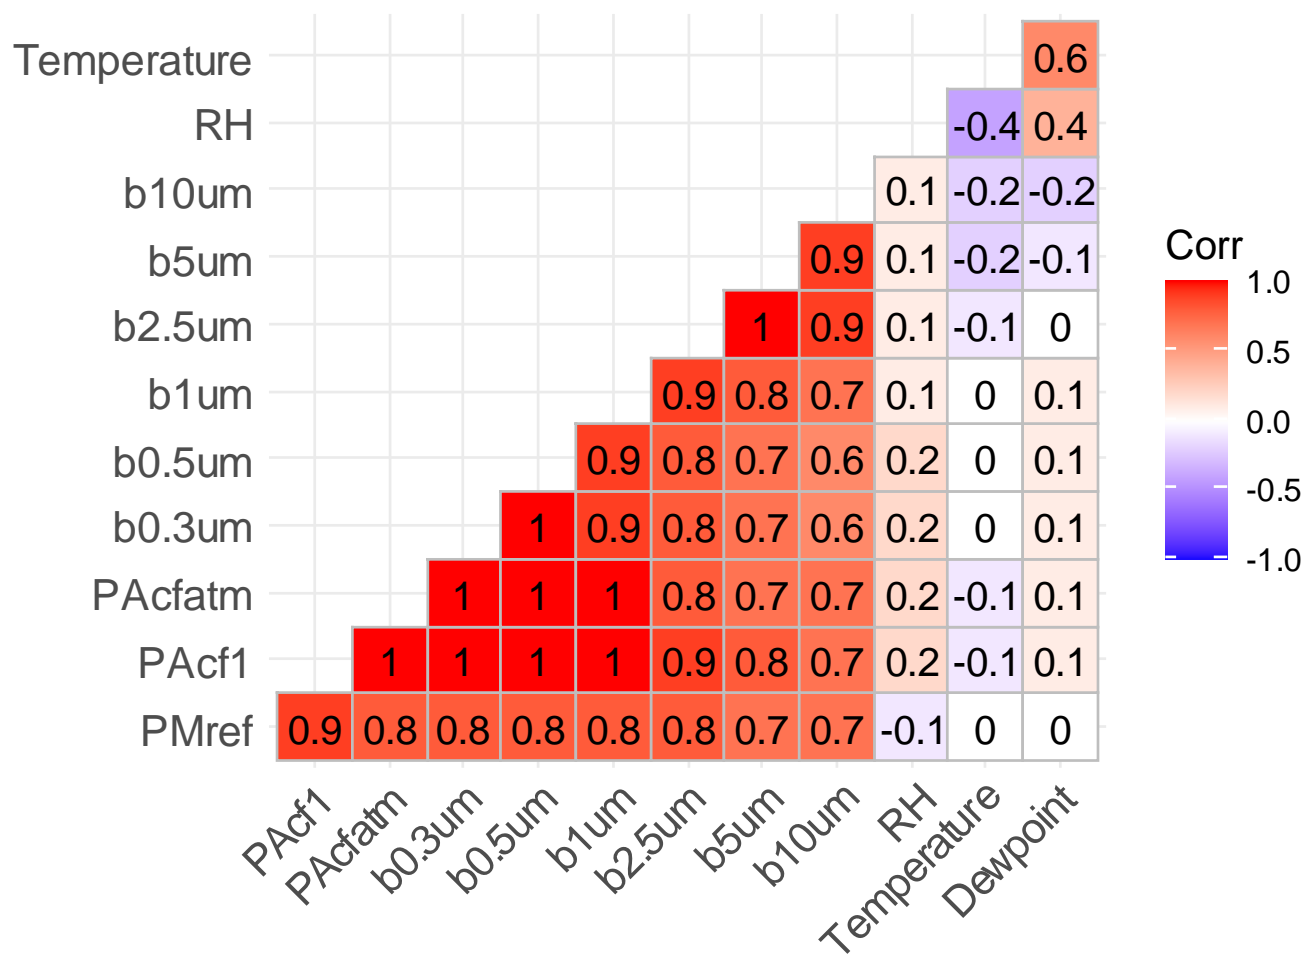

Figure S6. Correlogram showing the pearson correlation (Corr) between considered correction input variables.

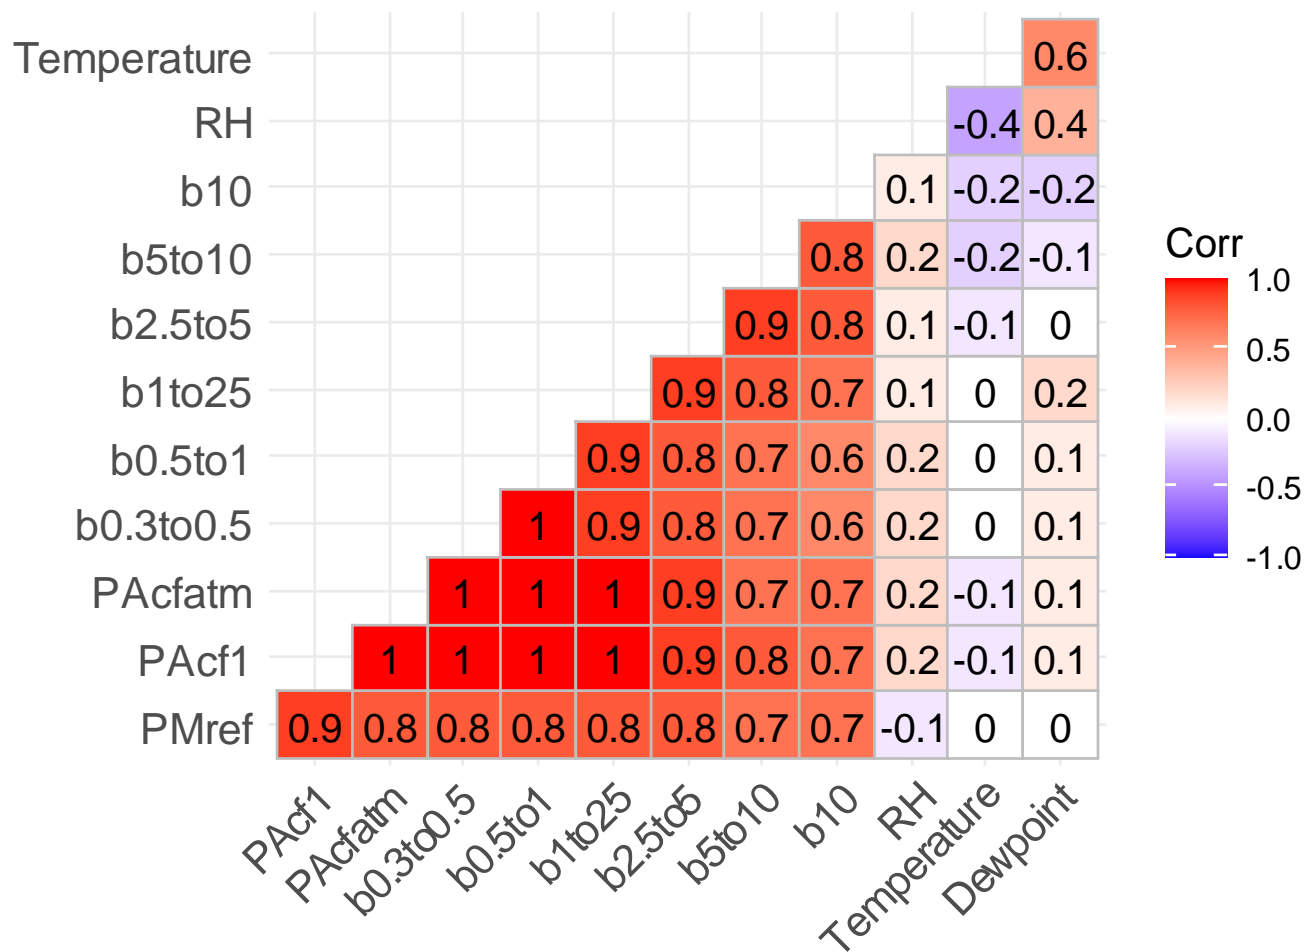

Figure S7. Correlogram showing the pearson correlation (Corr) between considered correction input variables including the difference between bins (e.g. b0.3to0.5 = bin<0.3 - bin<0.5).

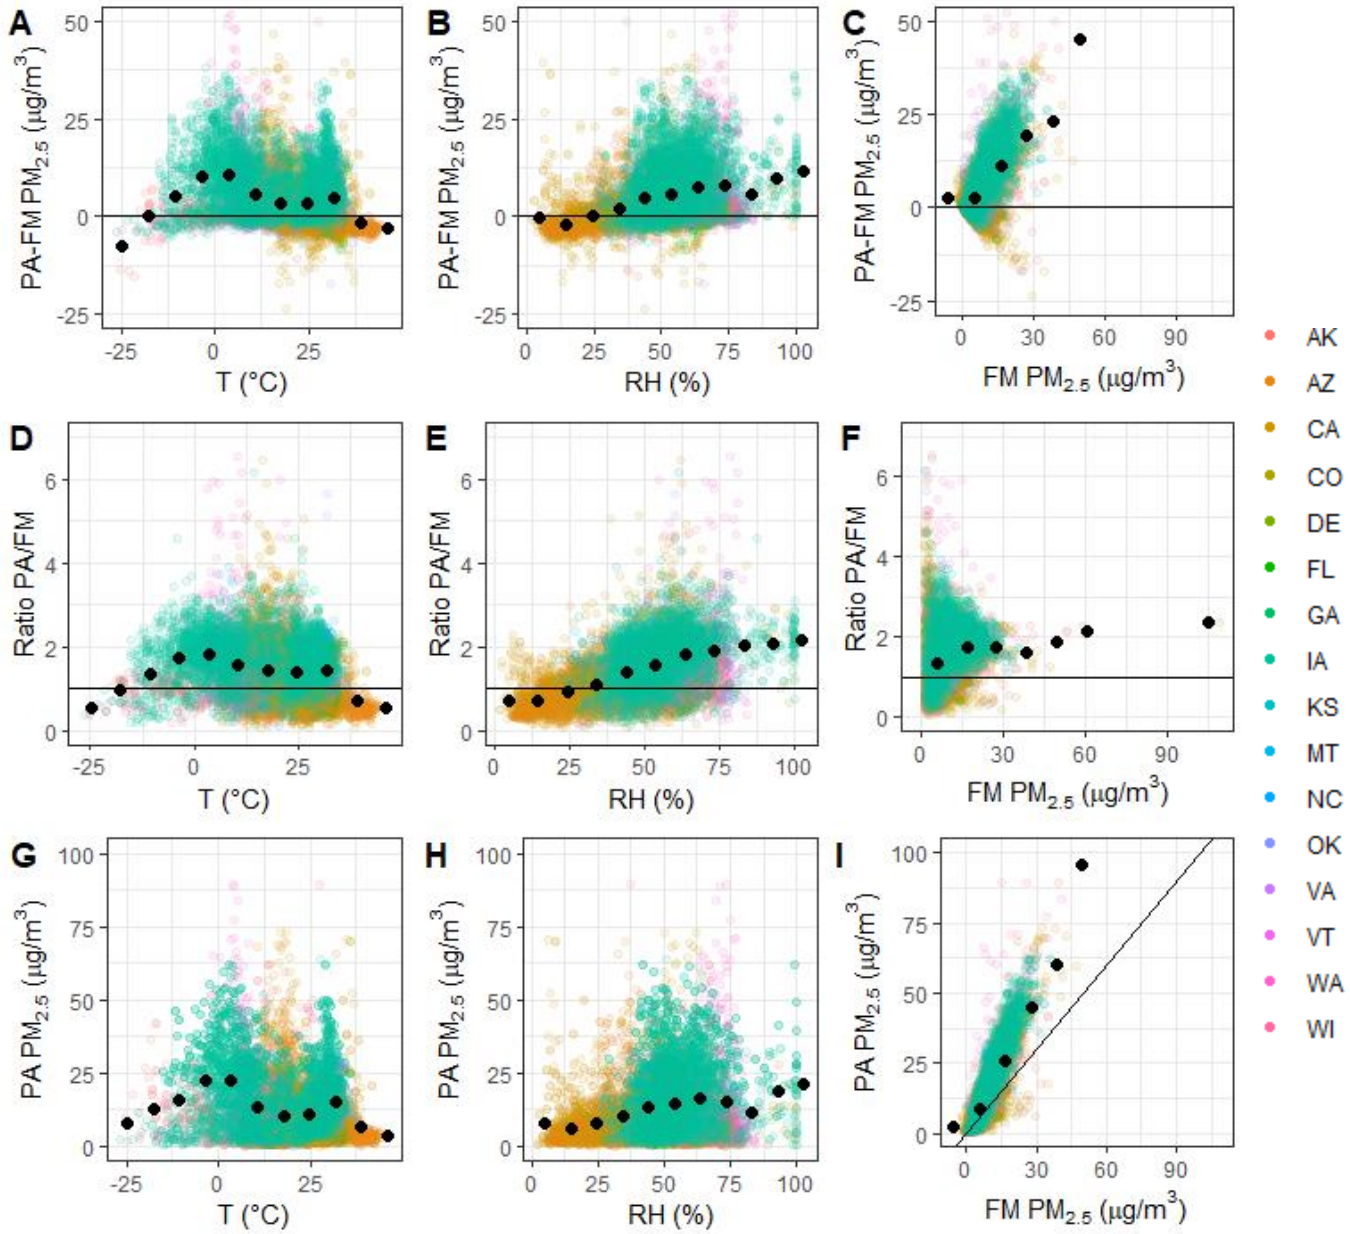

Figure S8. Error and ratio between uncorrected cf\_1 PurpleAir (PA) and federal equivalent or reference method measurements (FM) along with raw PurpleAir  $PM_{2.5}$  as influenced by temperature, relative humidity, and FEM or FRM  $PM_{2.5}$  concentration. Black points indicate averages in 10 bins. Note that there are limited points in the high concentration bins.



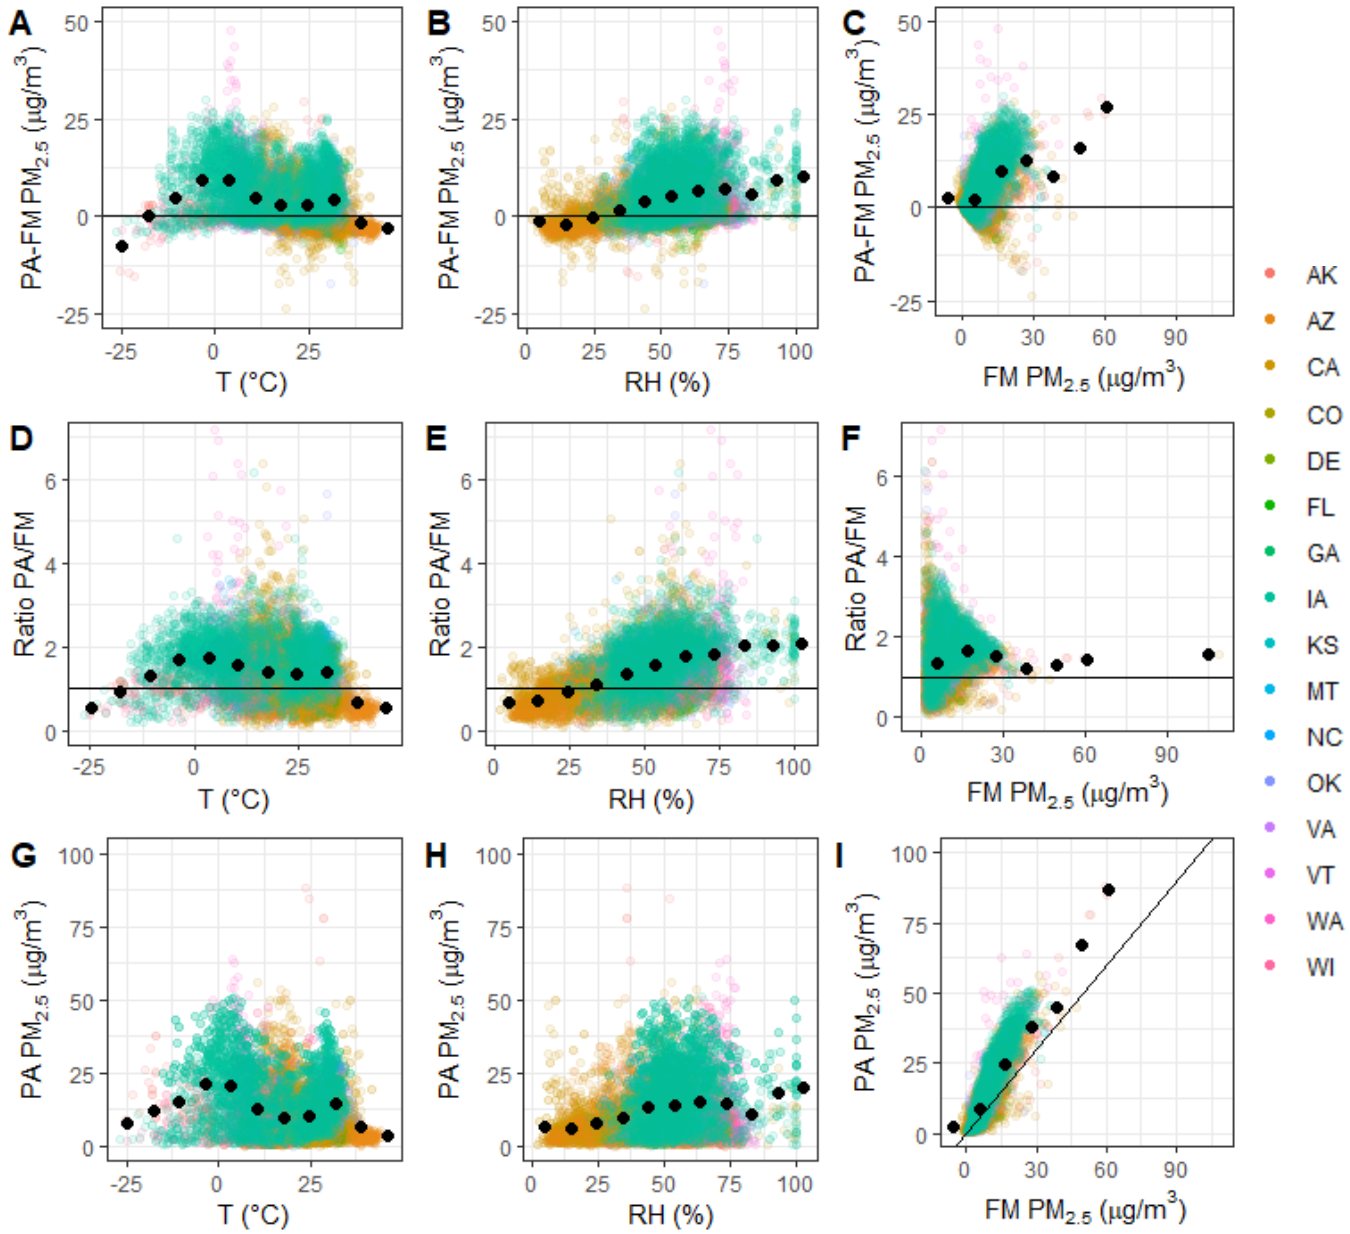

Figure S9. Error and ratio between raw cf\_atm PurpleAir (PA) and federal equivalent or reference method measurements (FM) along with raw PurpleAir PM<sub>2.5</sub> as influenced by temperature, relative humidity, and FEM or FRM PM<sub>2.5</sub> concentration. Black points indicate averages in 10 bins. Note that there are limited points in high concentration bins leading to greater uncertainty.

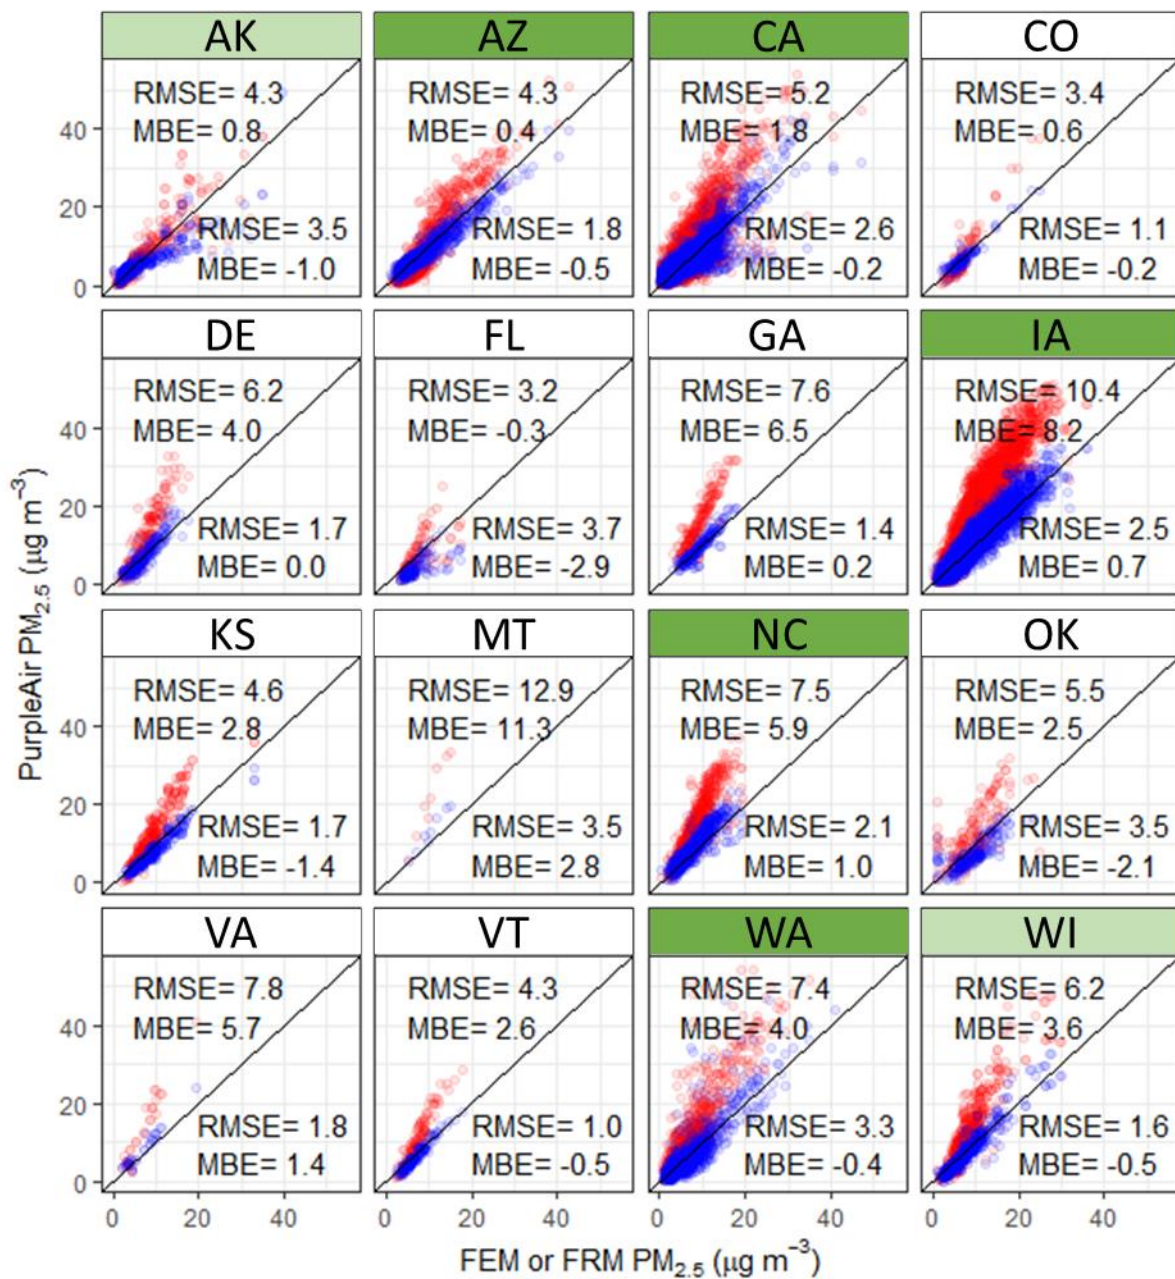

Figure S10. Raw [cf\_atm] PurpleAir  $\text{PM}_{2.5}$  as shown on PurpleAir.com (red) and final corrected data (blue) with the RMSE and MBE in  $\mu\text{g m}^{-3}$  reported in the top left corner for the raw data and the lower right for the corrected data. States with at least 1 year of data have green plot labels with light green labels indicating almost 1 year (>10 months).

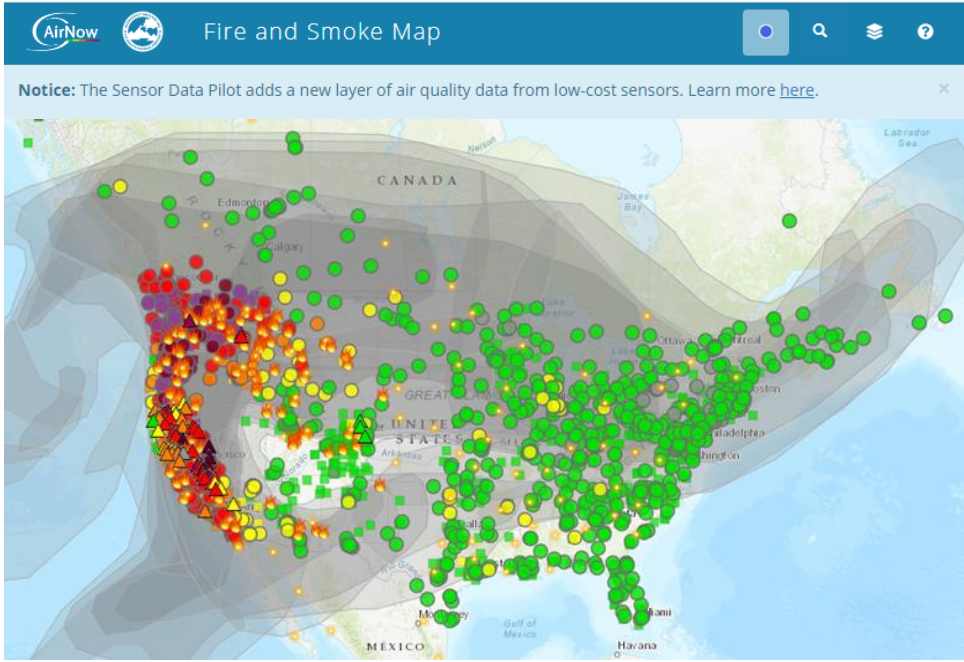

Figure S11. AirNow Fire and Smoke Map (fire.airnow.gov)
